# Supplementary material for: Qualitative and Quantitative Analysis of Triterpene Saponins from Tea Seed Pomace (Camellia oleifera Abel) and Their Activities against Bacteria and Fungi
Source: PubMed Central journal article supplement (PMC6271494; doi:10.3390/molecules19067568), 2014-06-06

# Supplementary

## MS spectrum results for Table 1

Peak 1 Retention time (min): 8.481

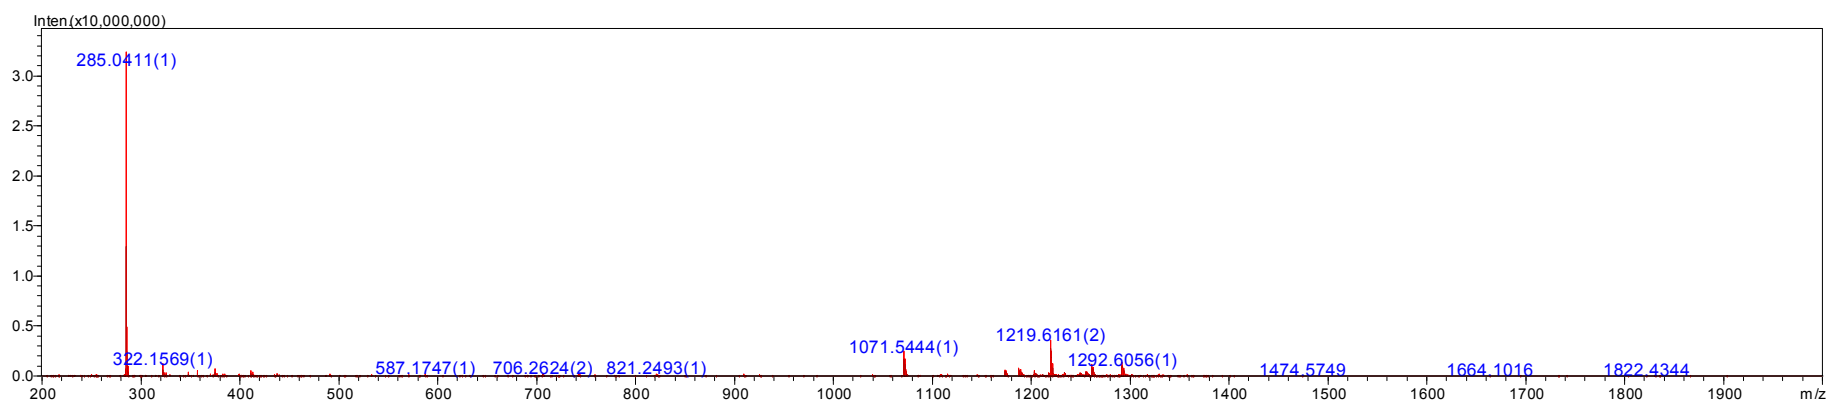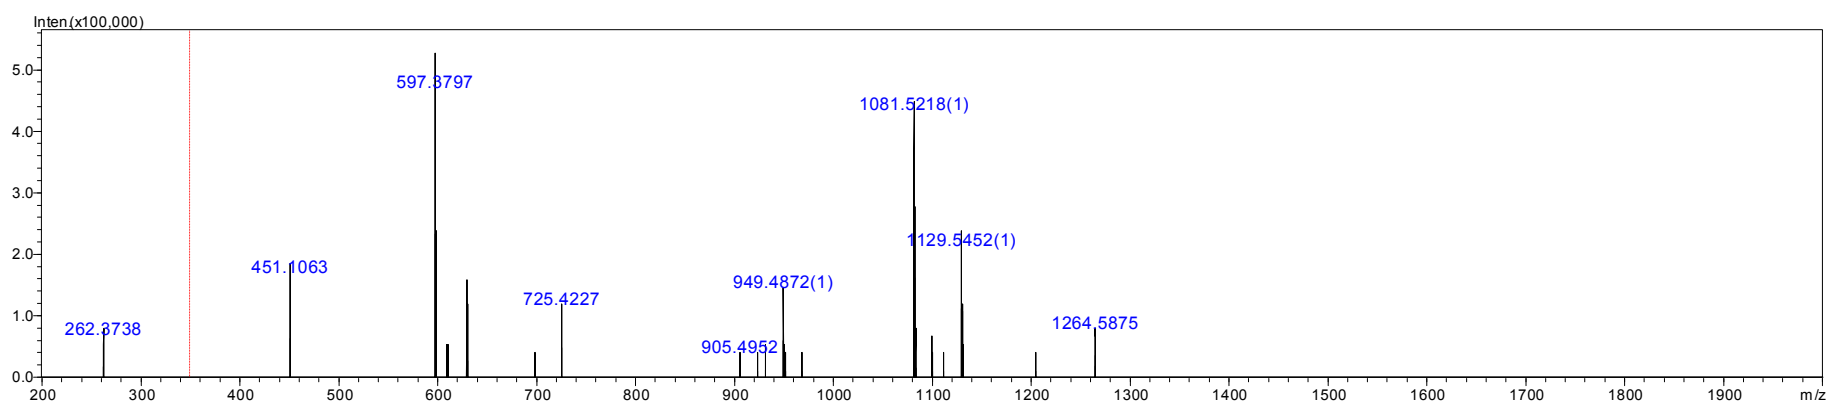

**Peak 2 Retention time (min): 8.987**

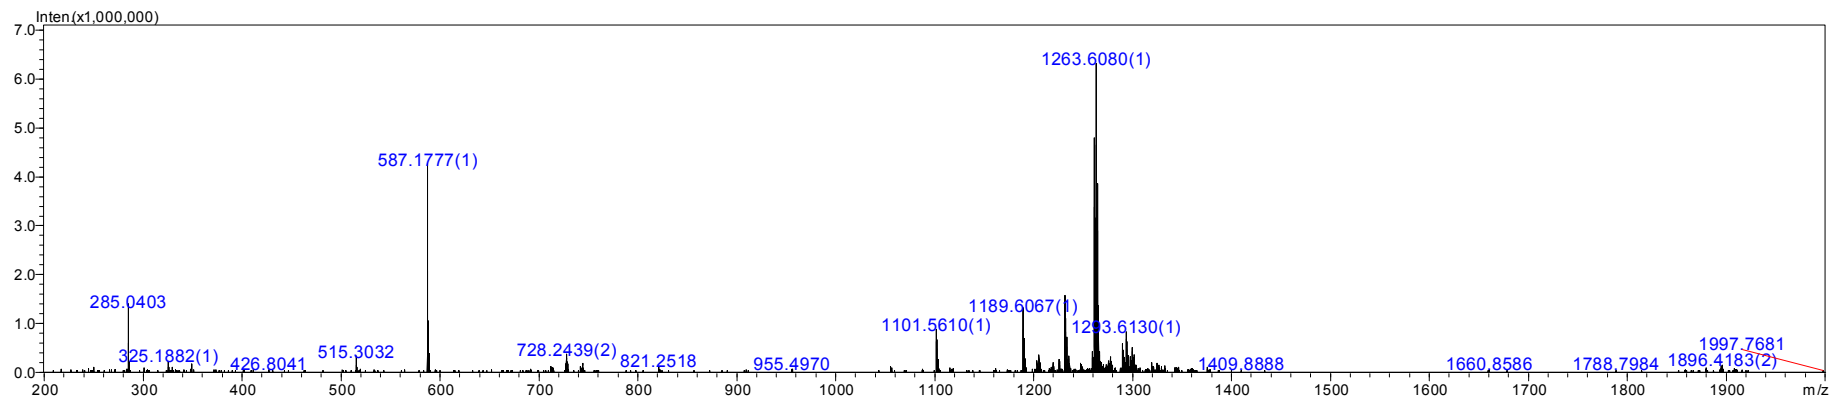

**Peak 3 Retention time (min): 9.303**

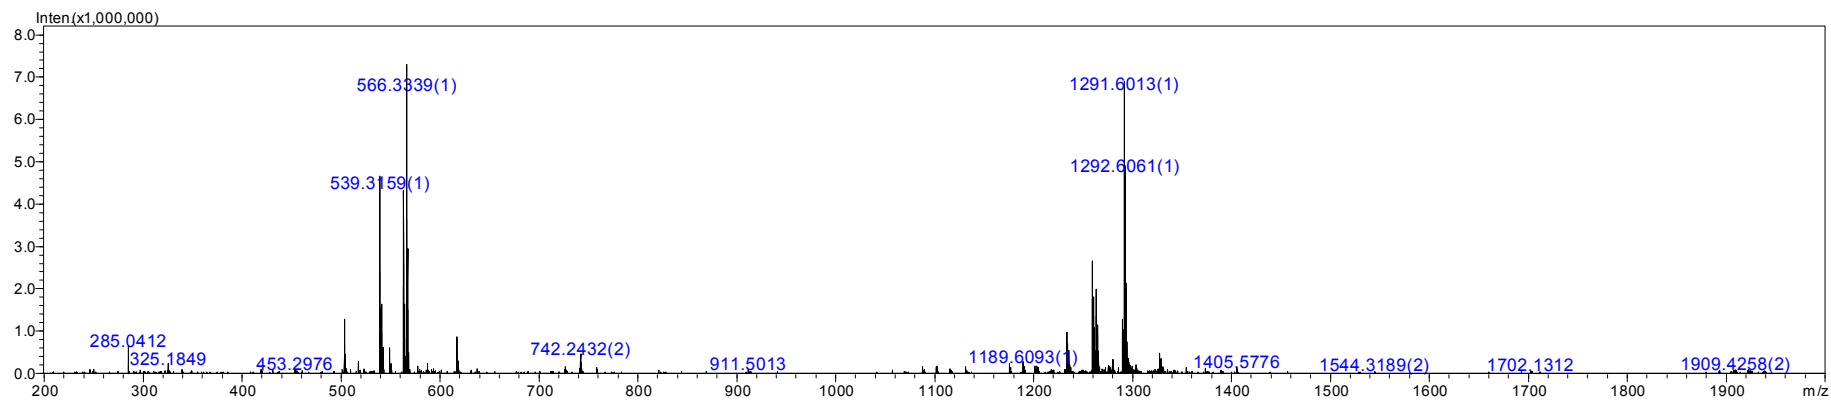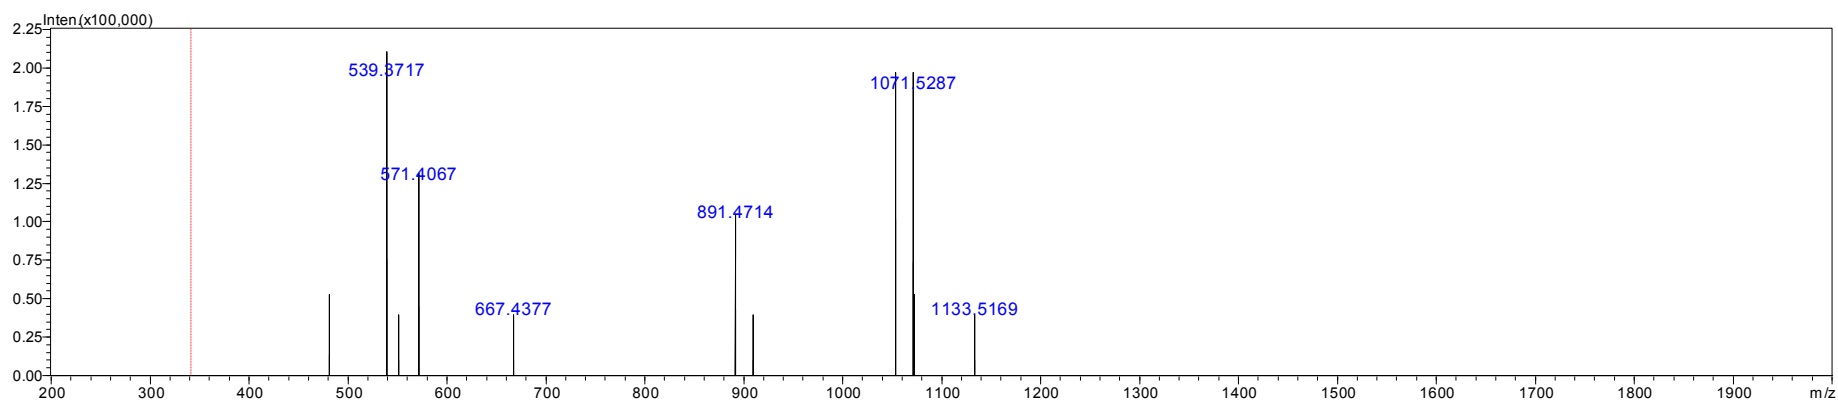

**Peak 4 Retention time (min): 9.810**

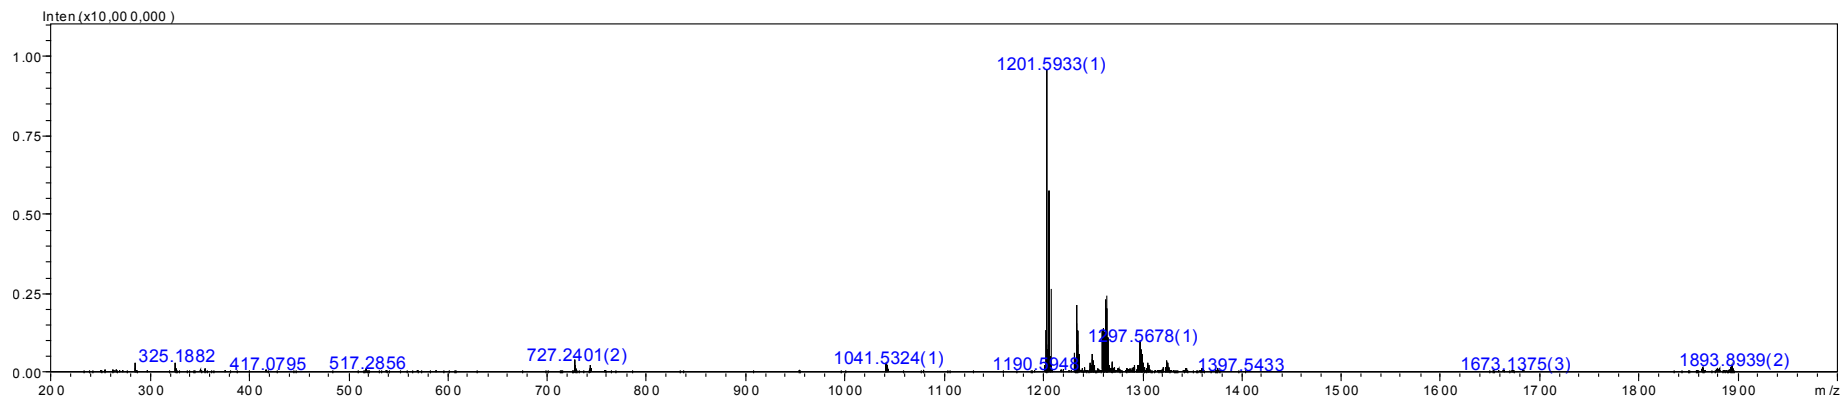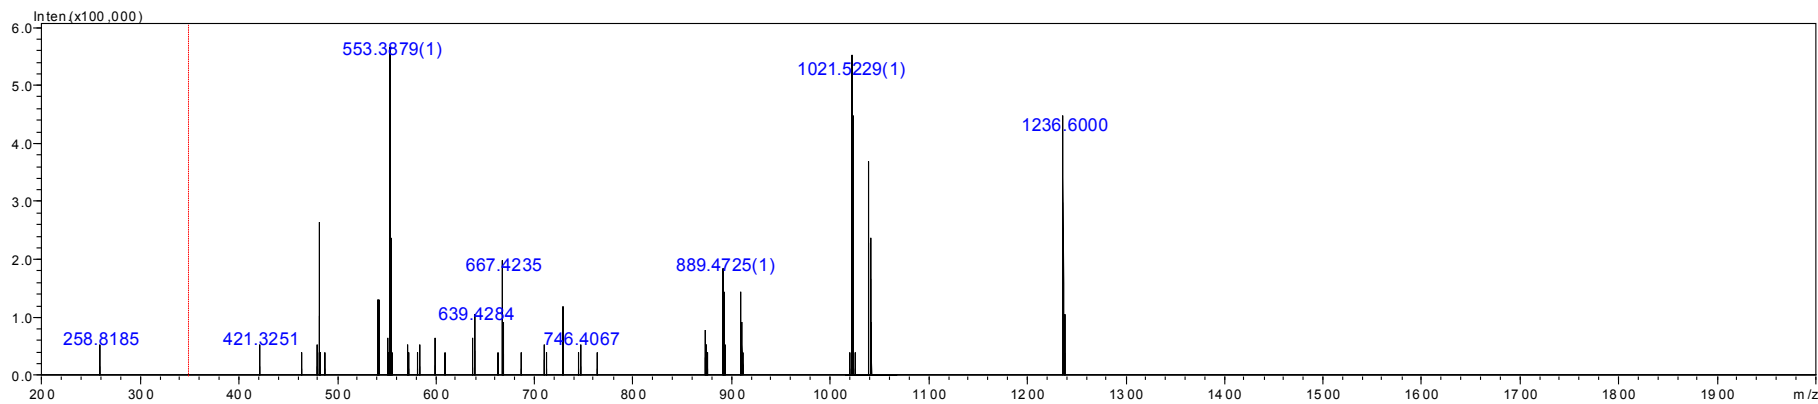

**Peak 5 Retention time (min): 10.633**

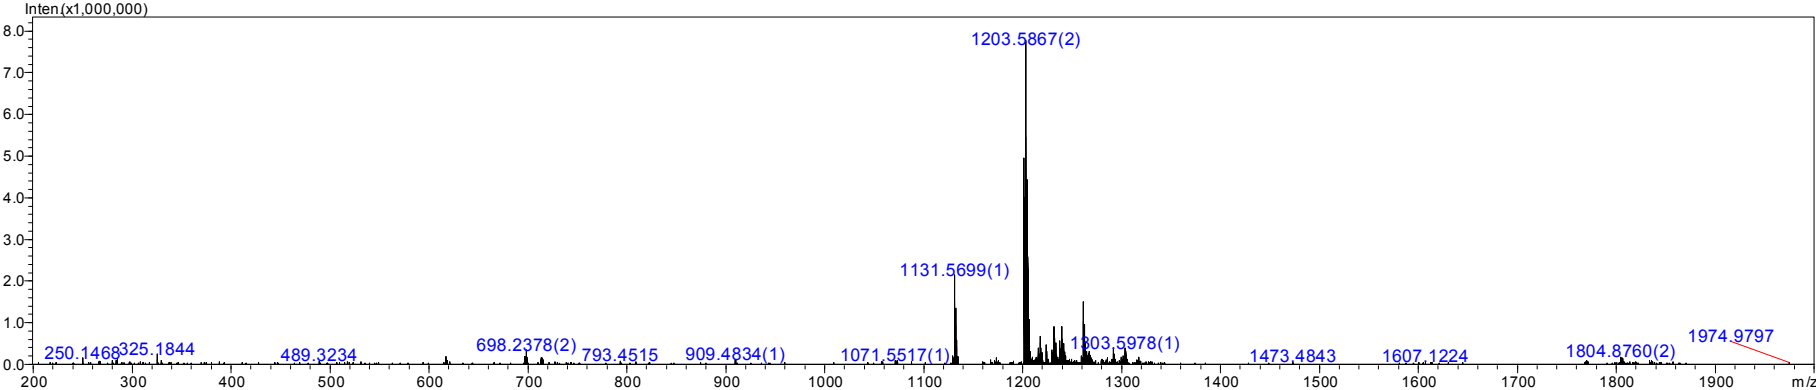

**Peak 6 Retention time (min): 11.202**

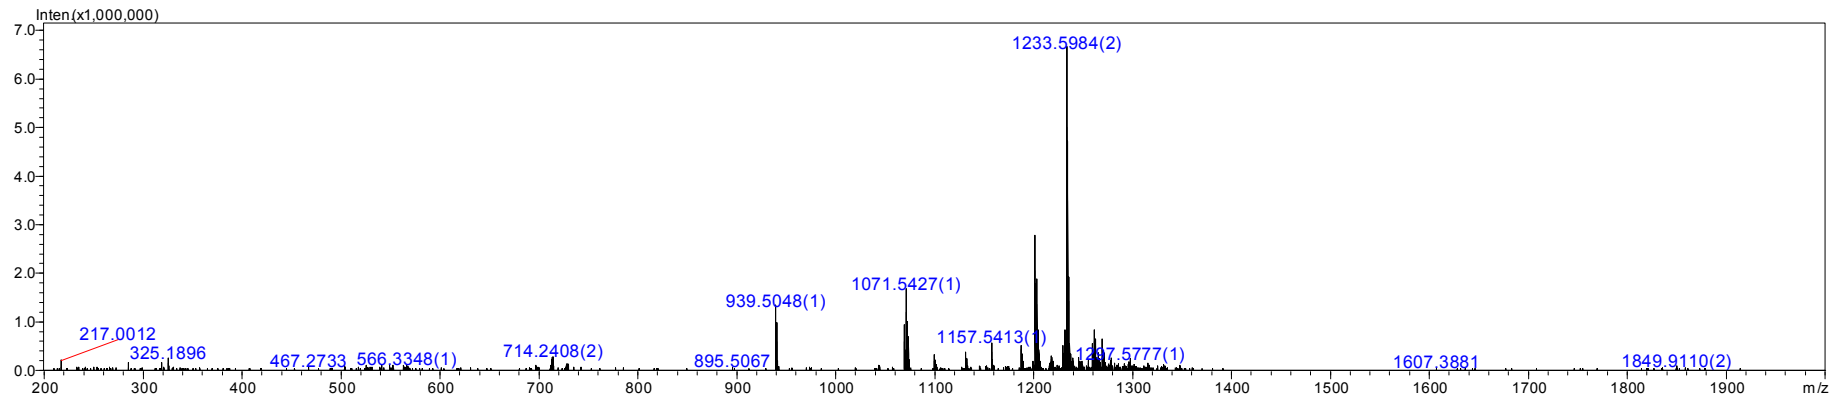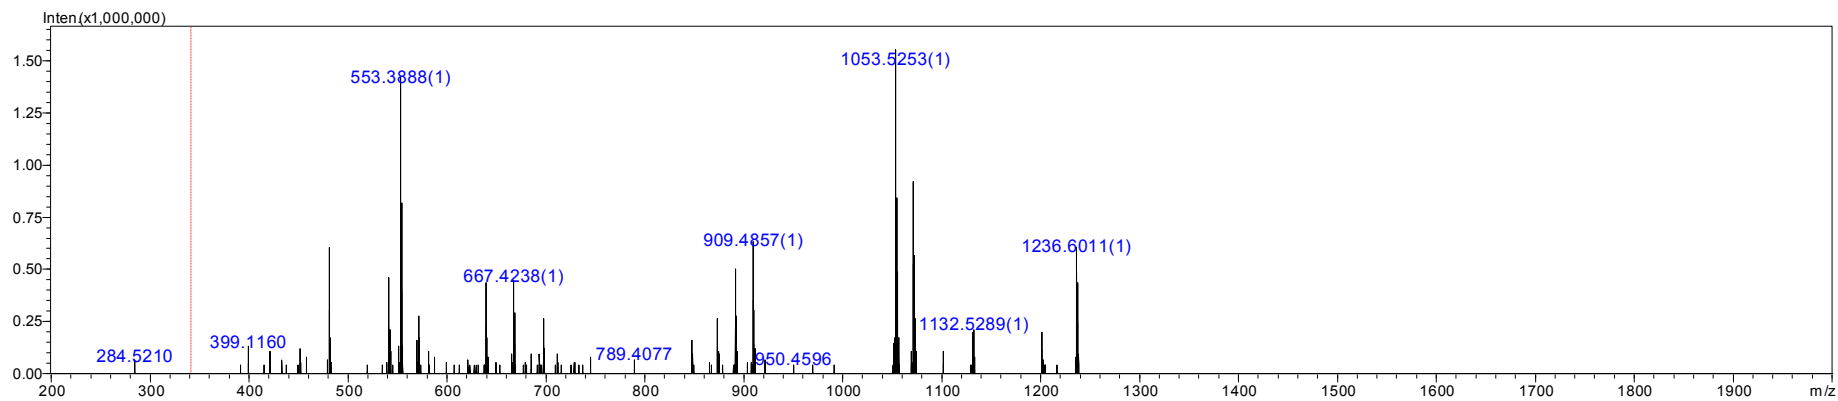

**Peak 7 Retention time (min): 11.772**

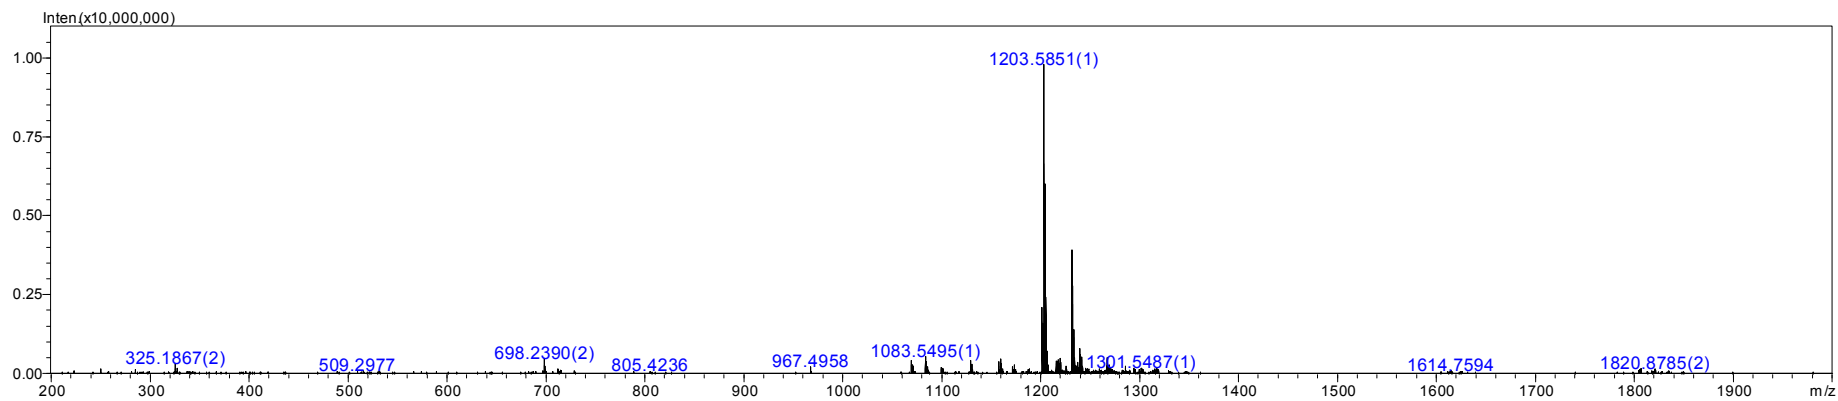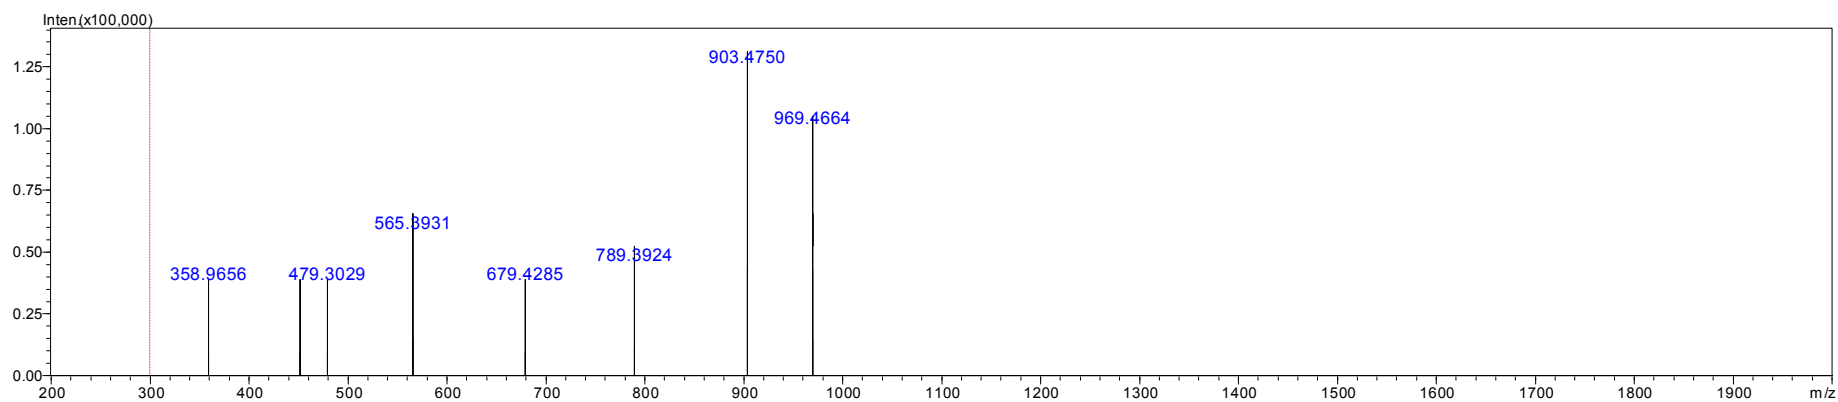

**Peak 8 Retention time (min): 12.911**

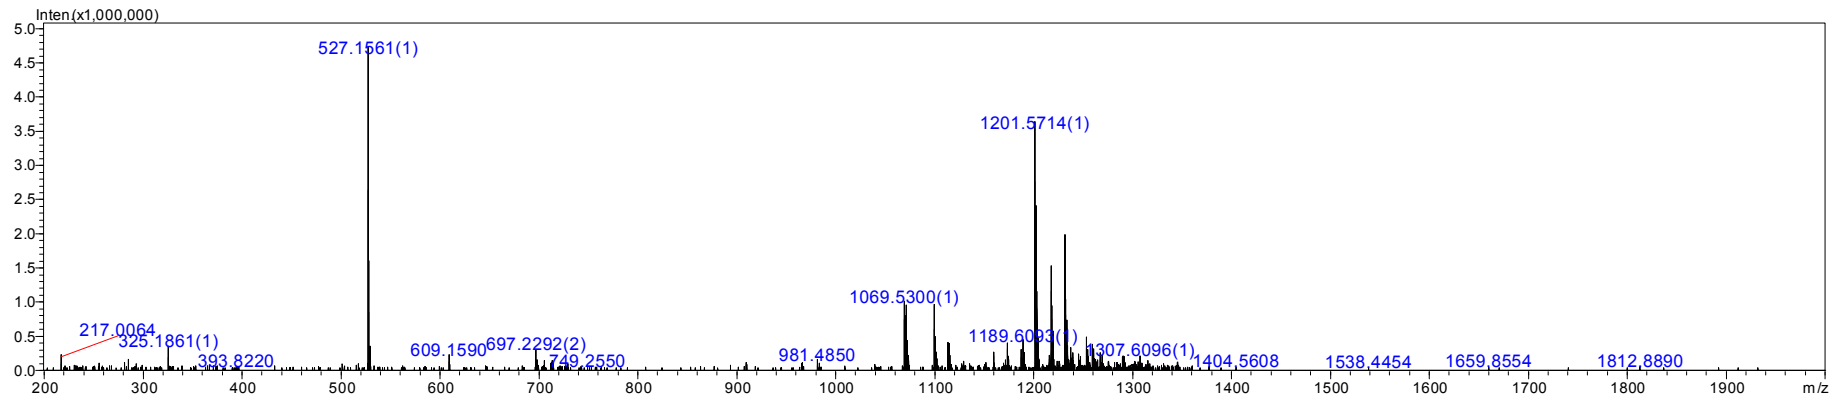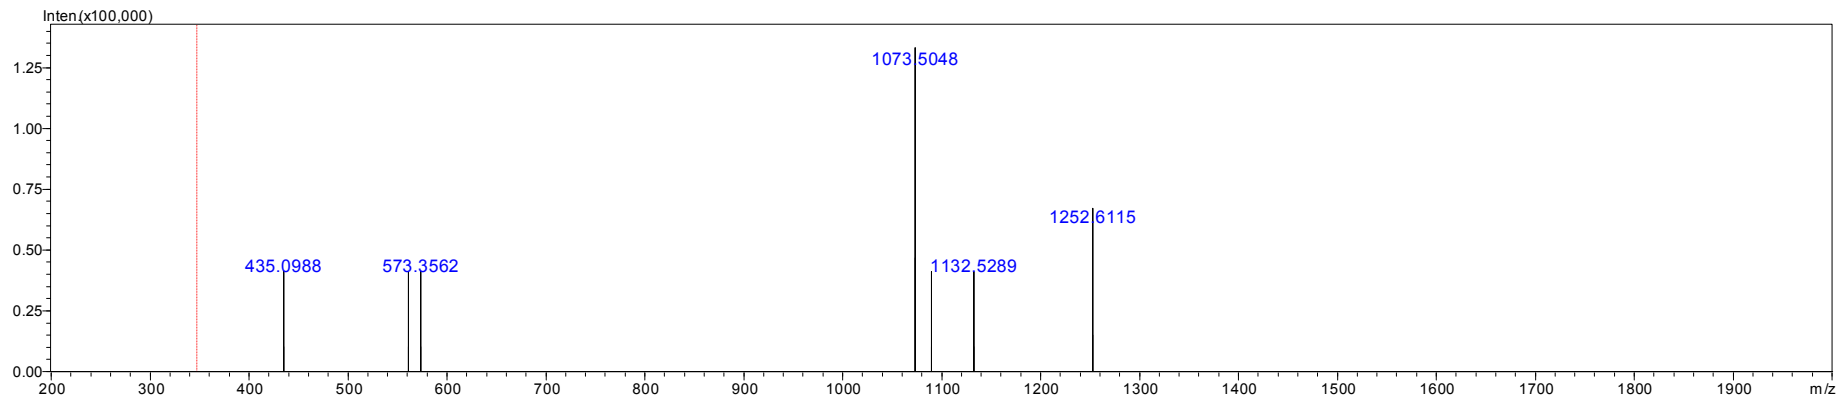



**Peak9 Retention time (min): 13.544**

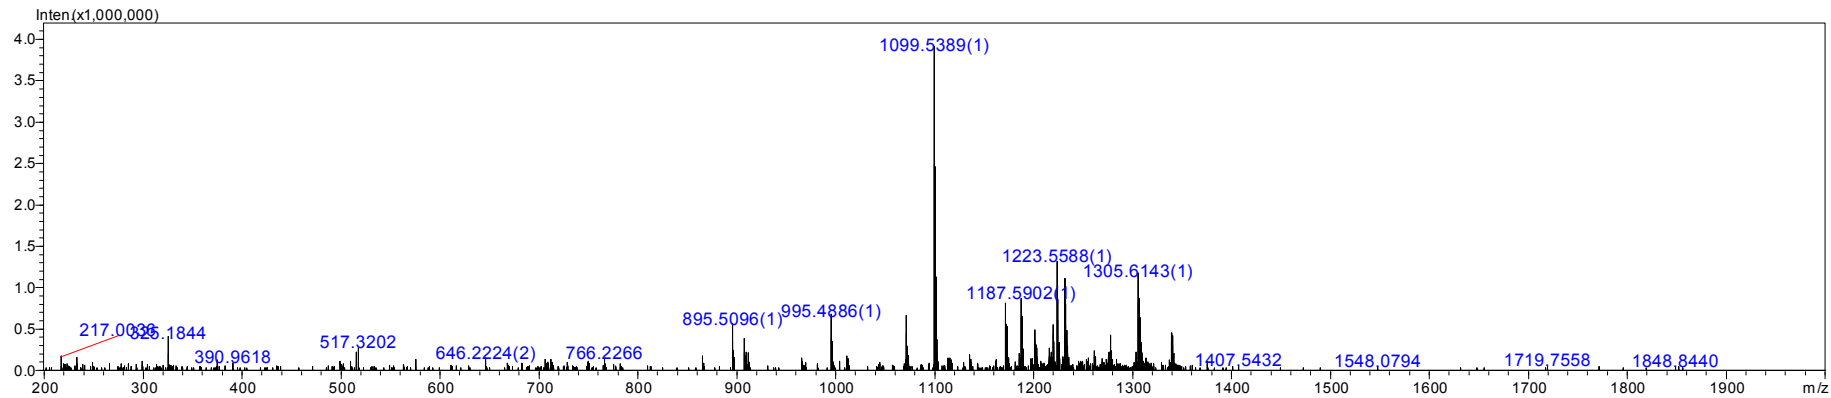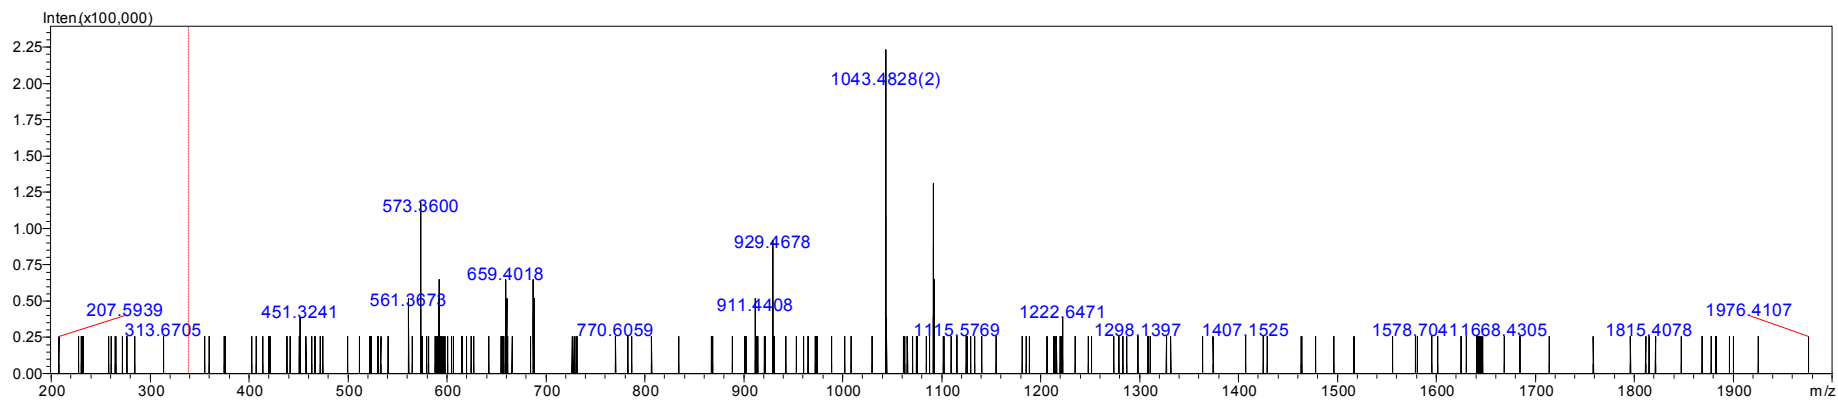

**Peak 10 Retention time (min): 14.240**

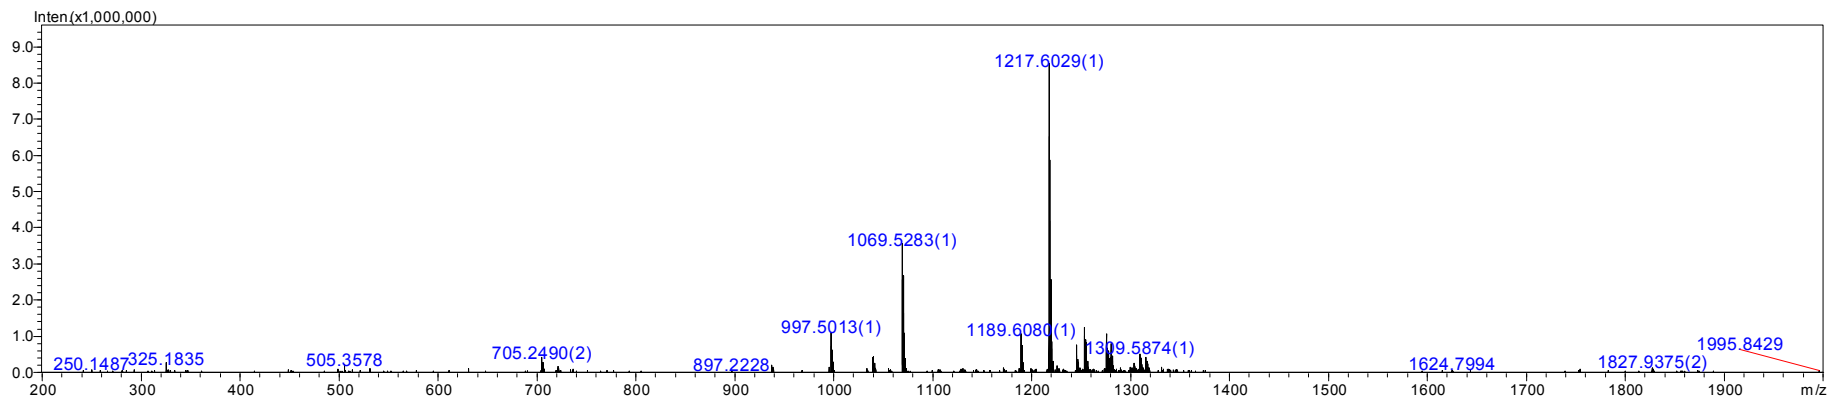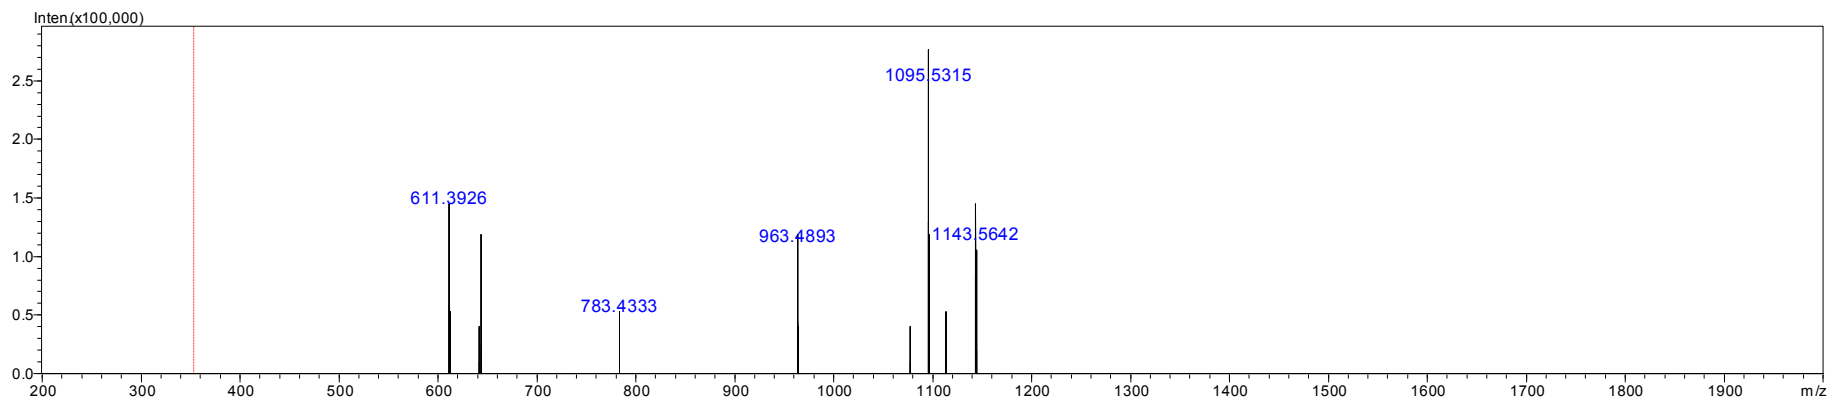

**Peak 11 Retention time (min): 15.063**

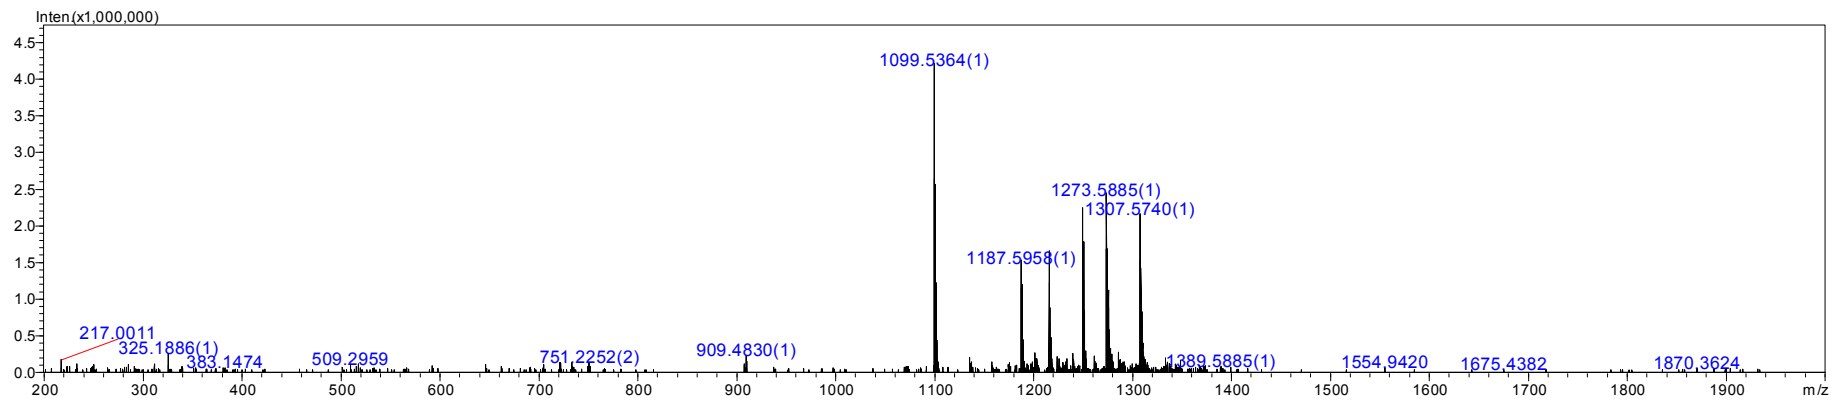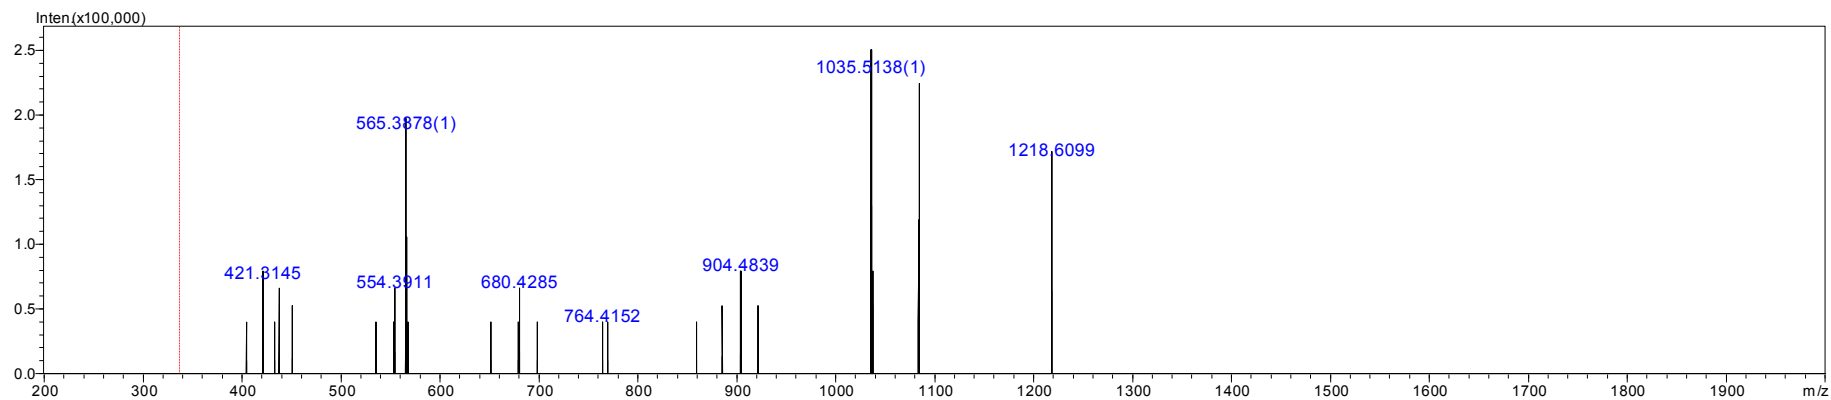

**Peak 12 Retention time (min): 16.139**

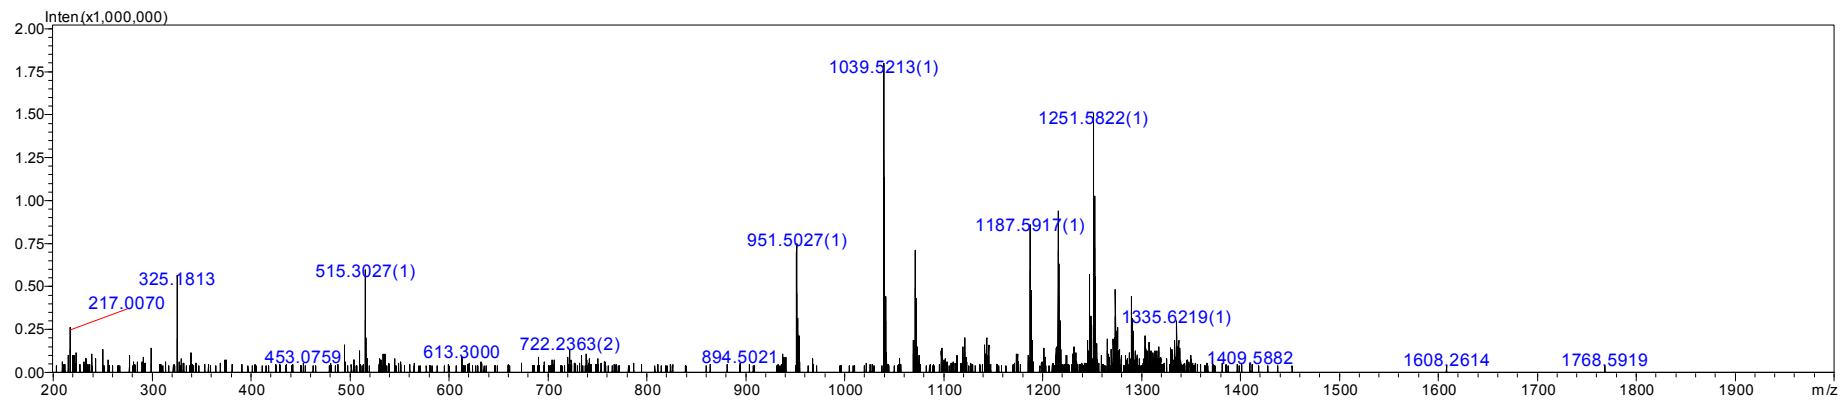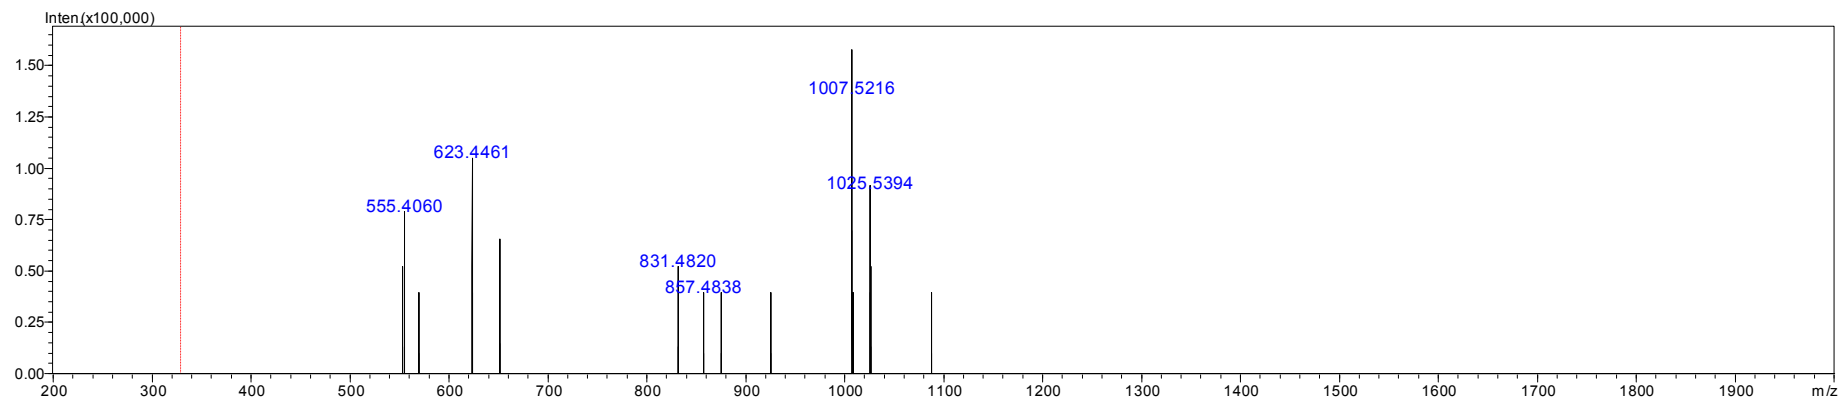

**Peak 13 Retention time (min): 16.898**

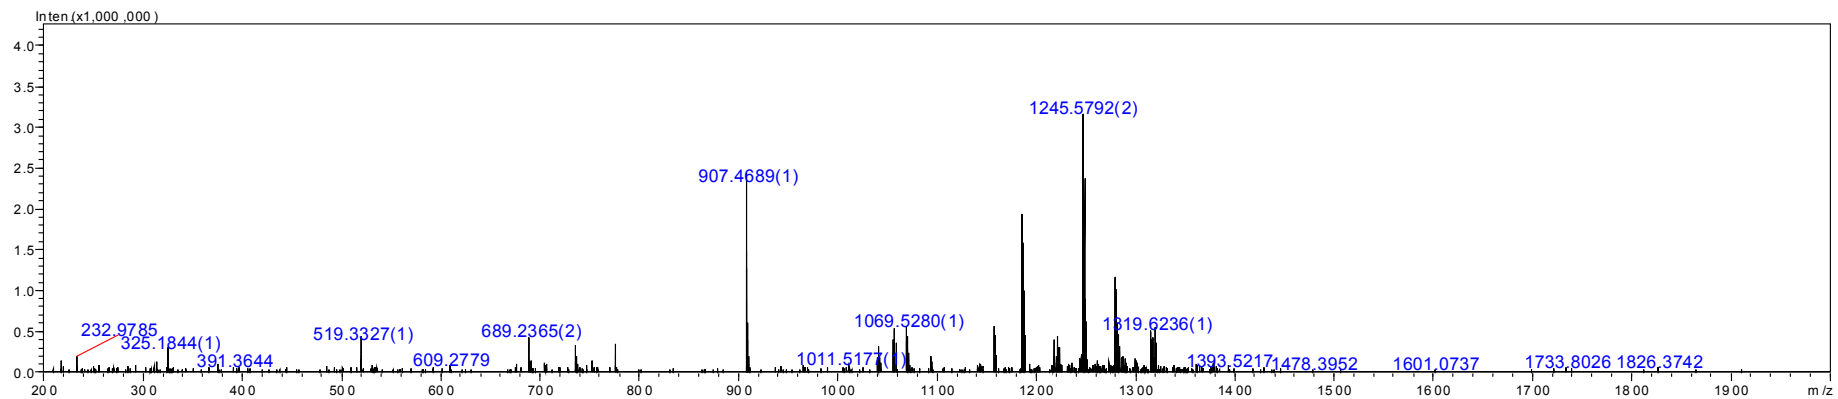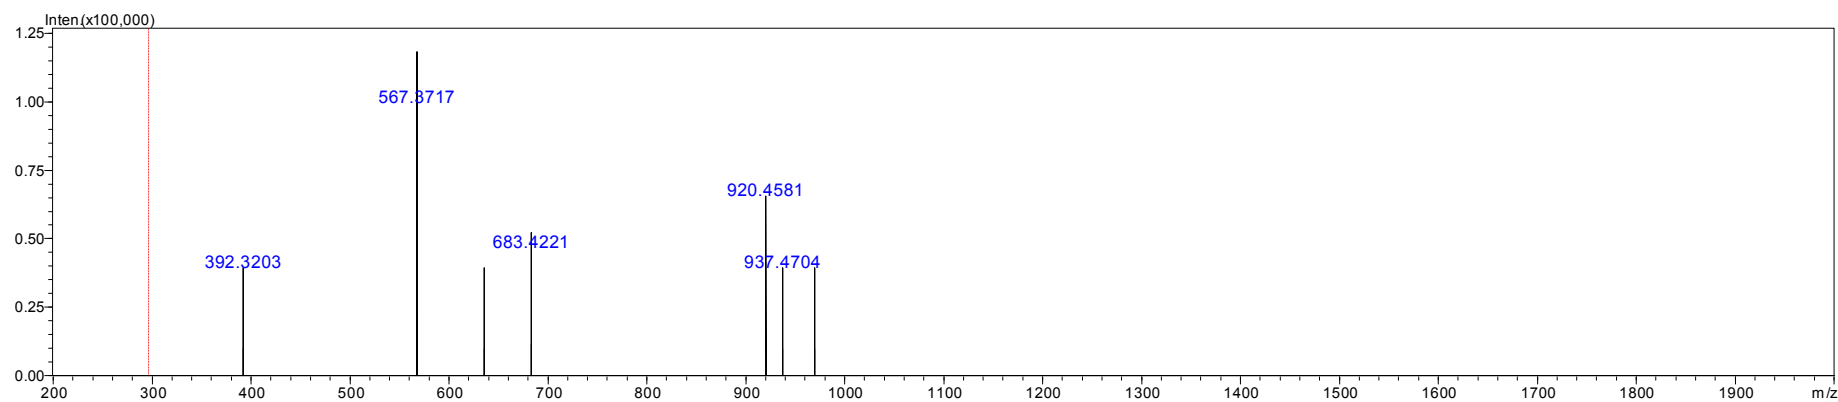

**Peak 14 Retention time (min): 17.531**

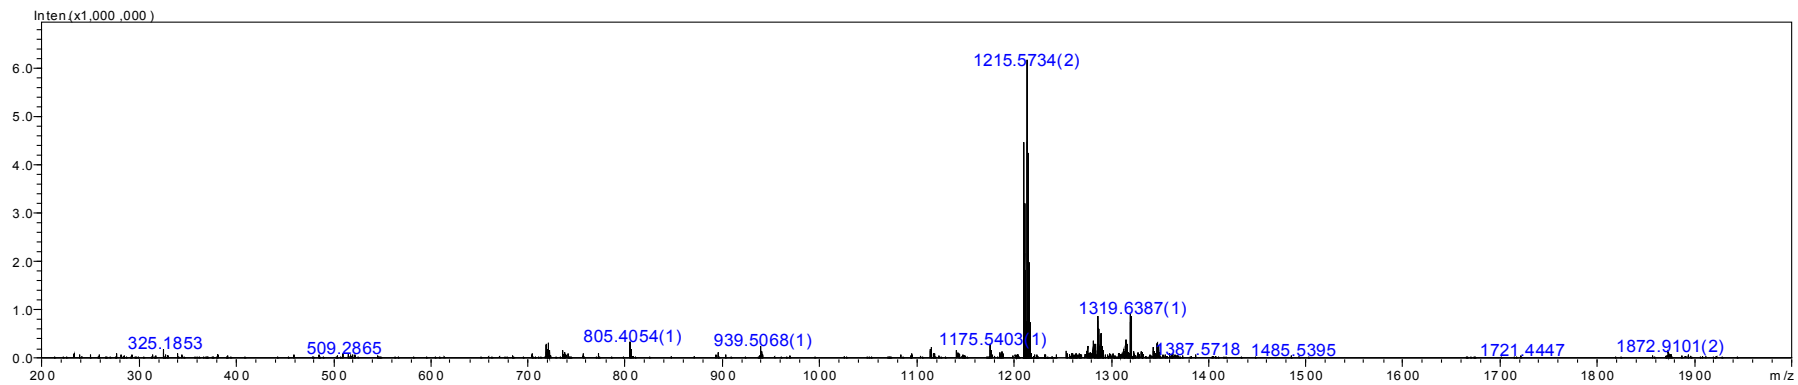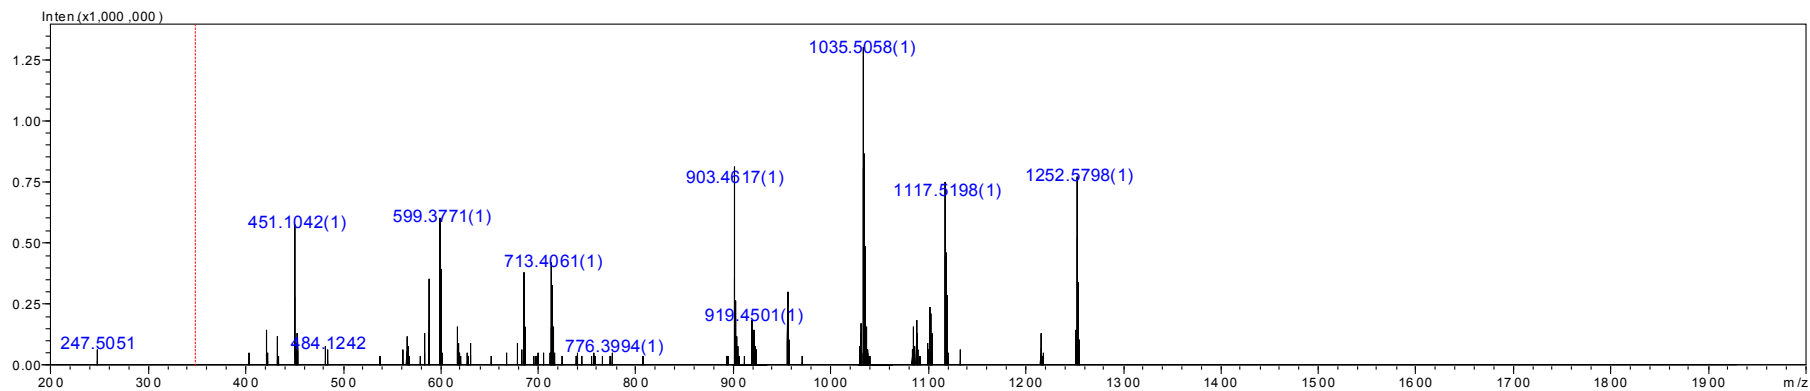

**Peak 15 Retention time (min): 18.670**

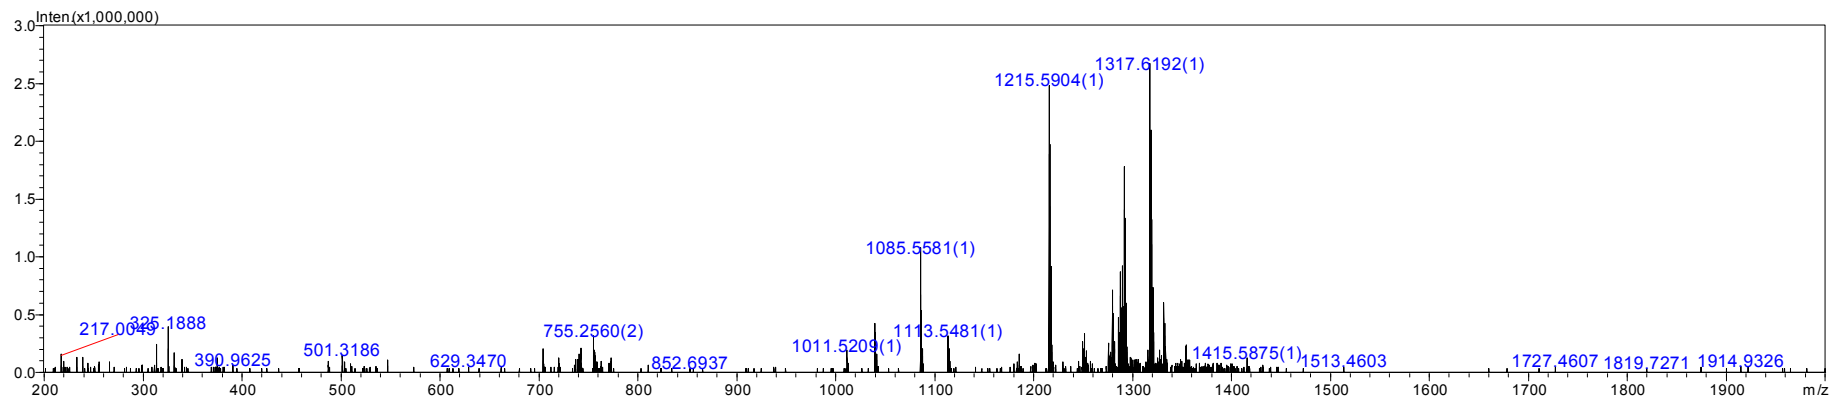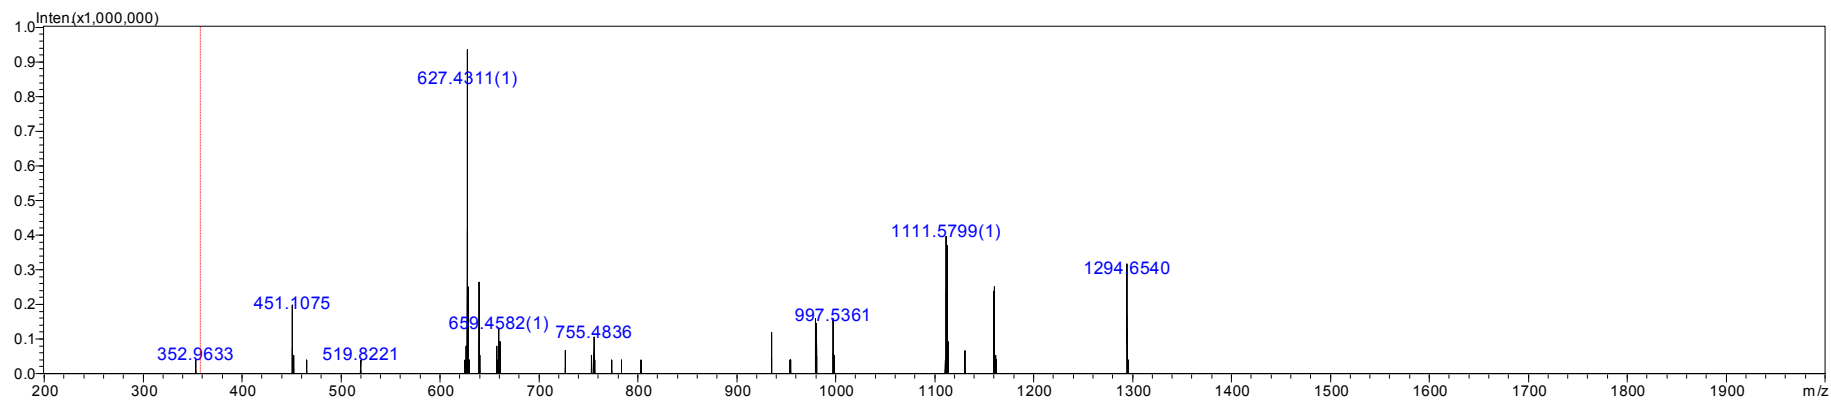

**Peak 16 Retention time (min): 19.746**

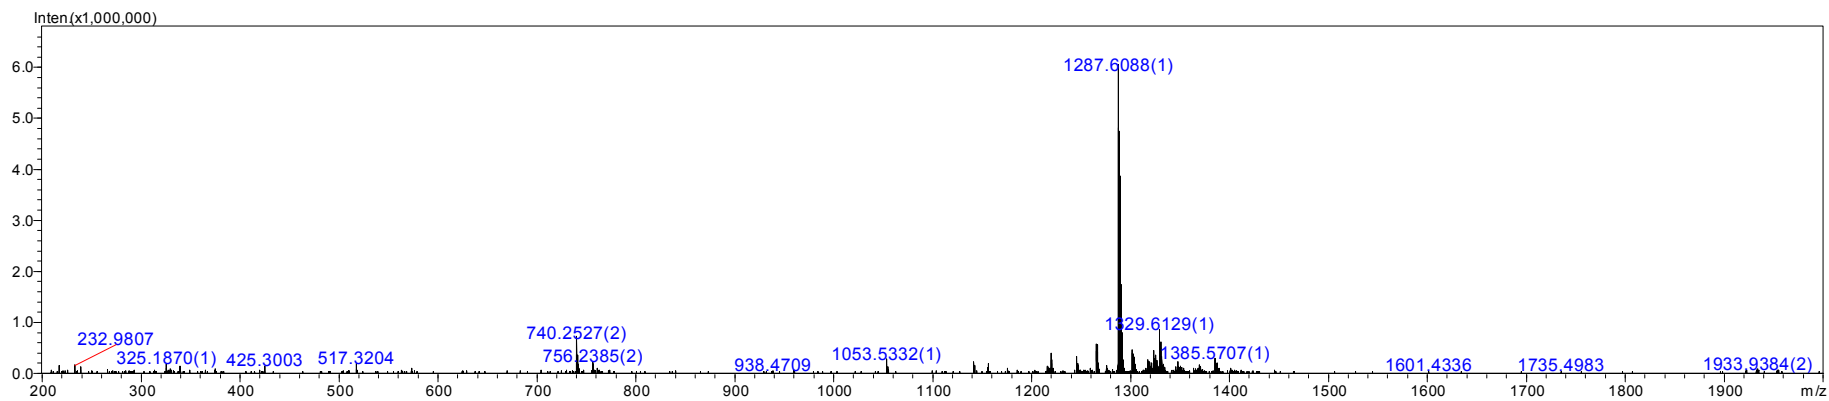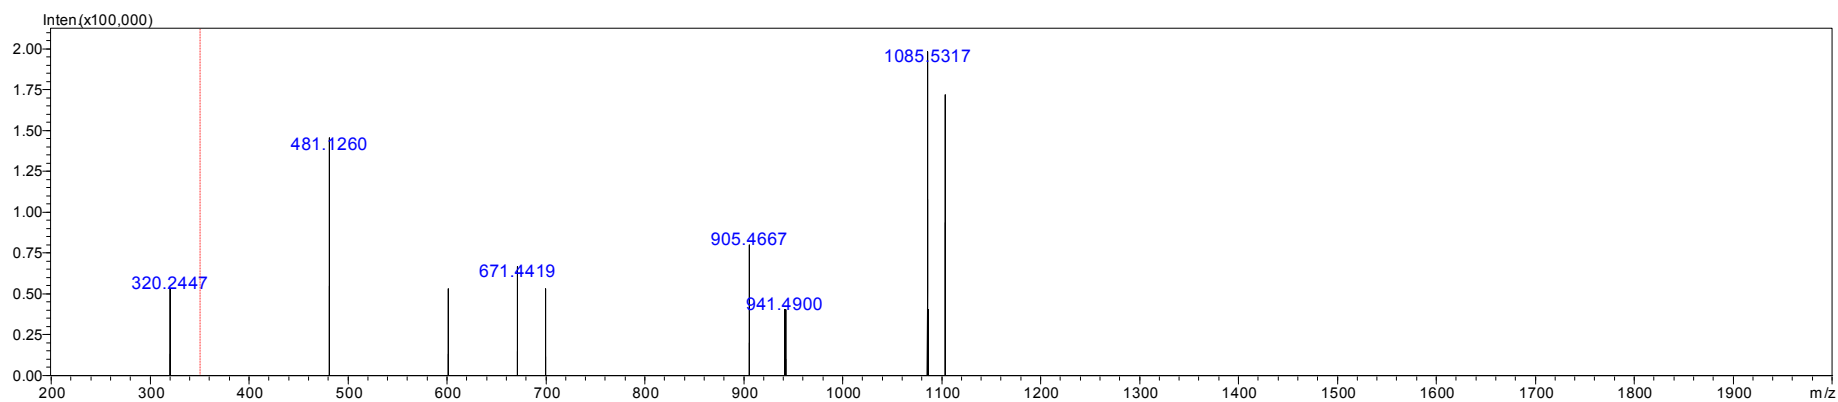



**Peak 17 Retention time (min): 20.506**

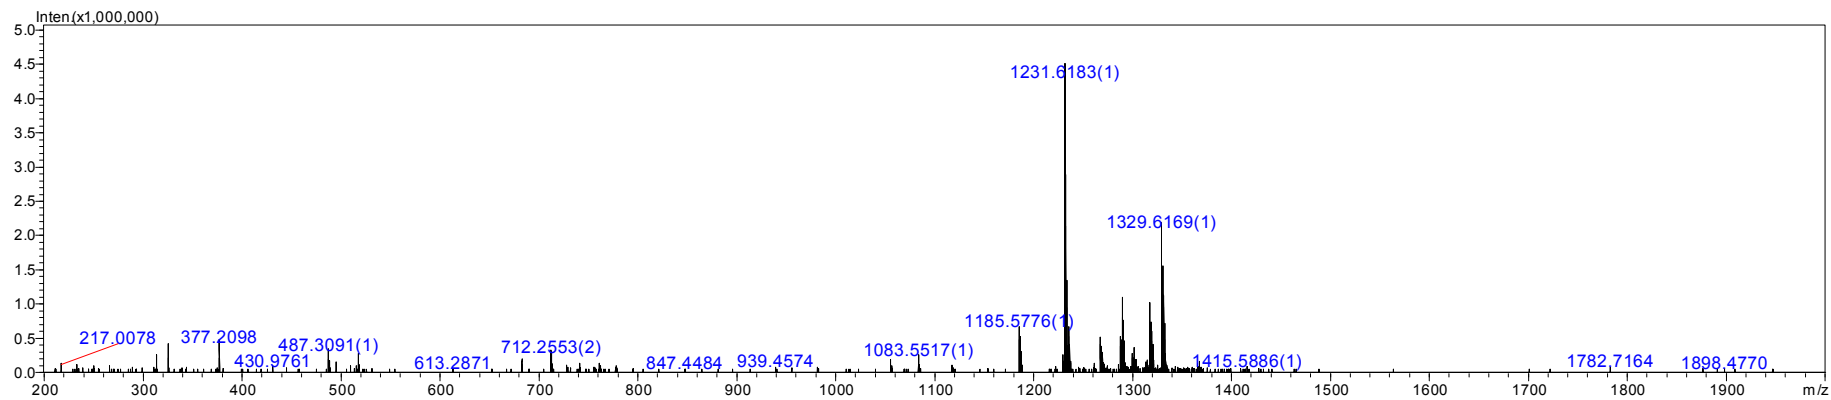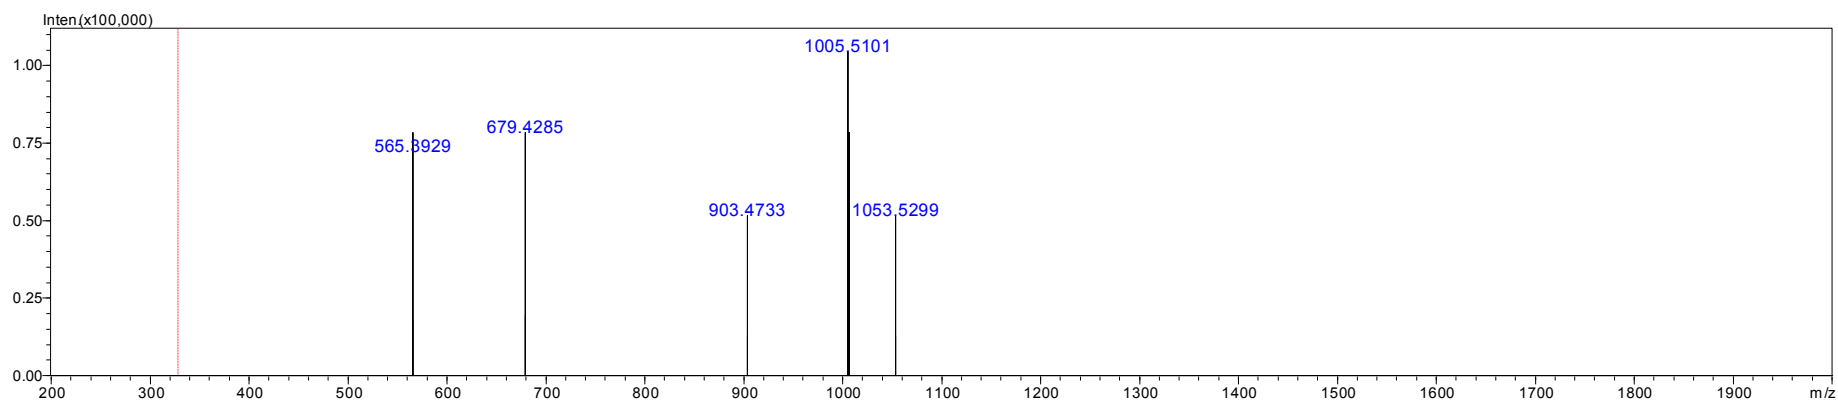

**Peak 18 Retention time (min): 21.265**

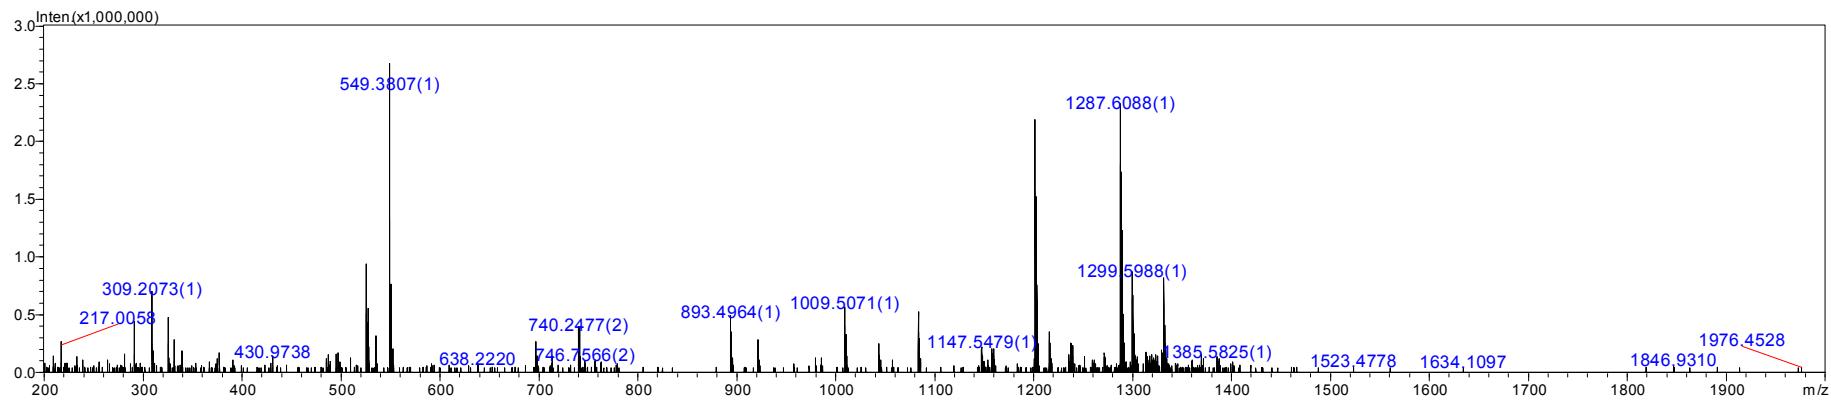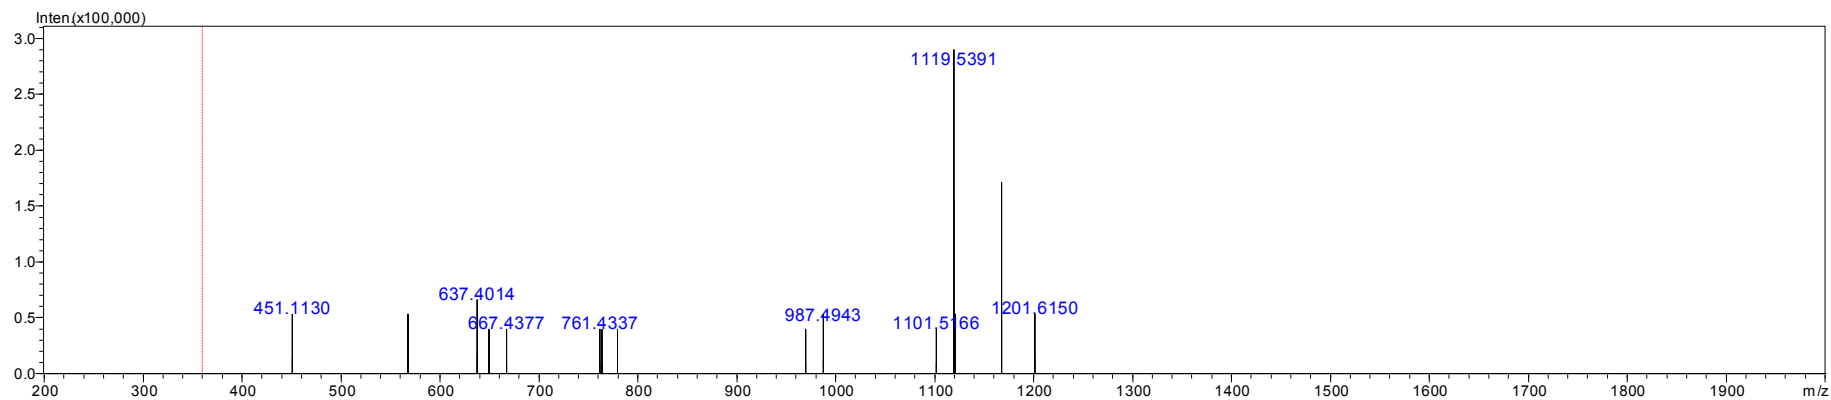

**Peak 19 Retention time (min): 25.252**

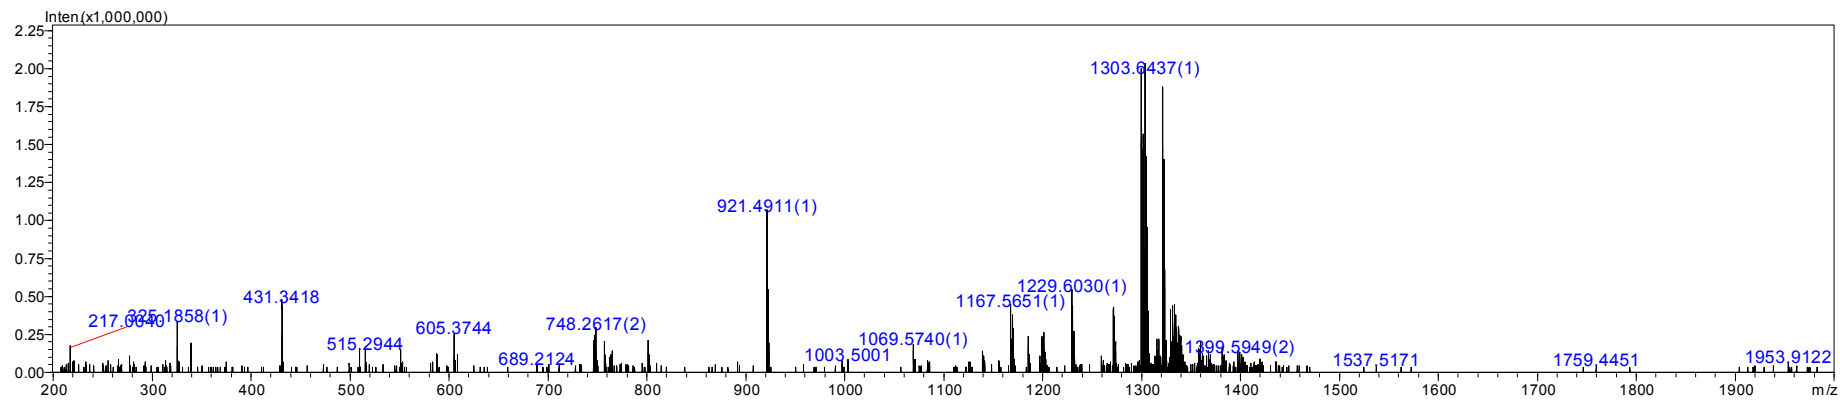

**Peak 20 Retention time (min): 28.290**

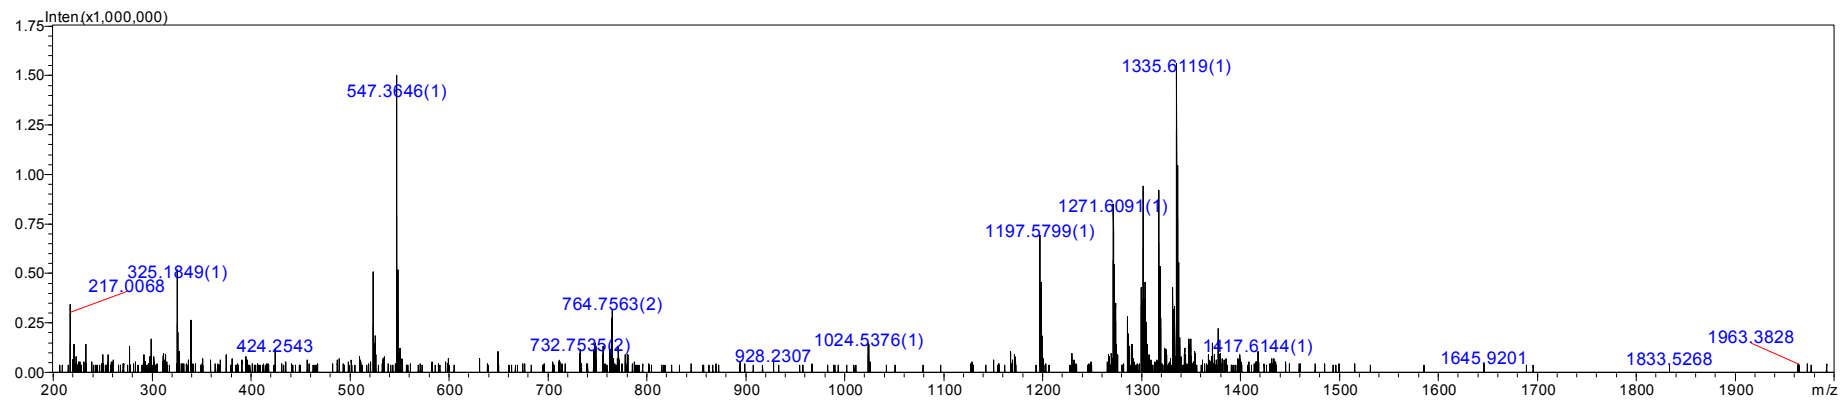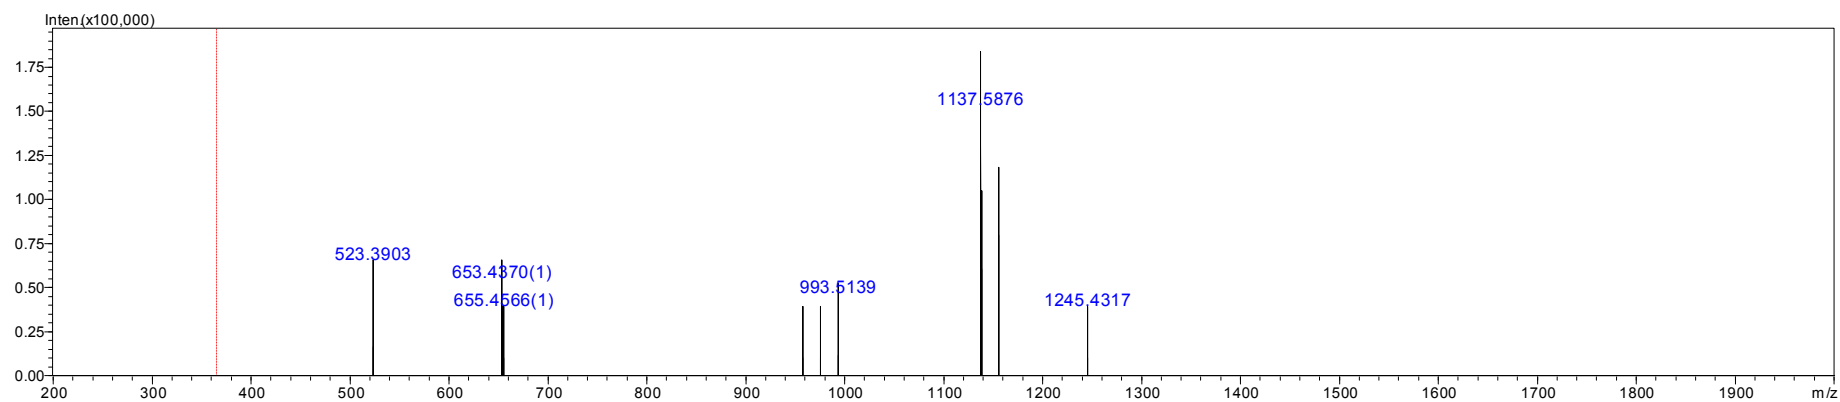

**Peak 21 Retention time (min): 29.429**

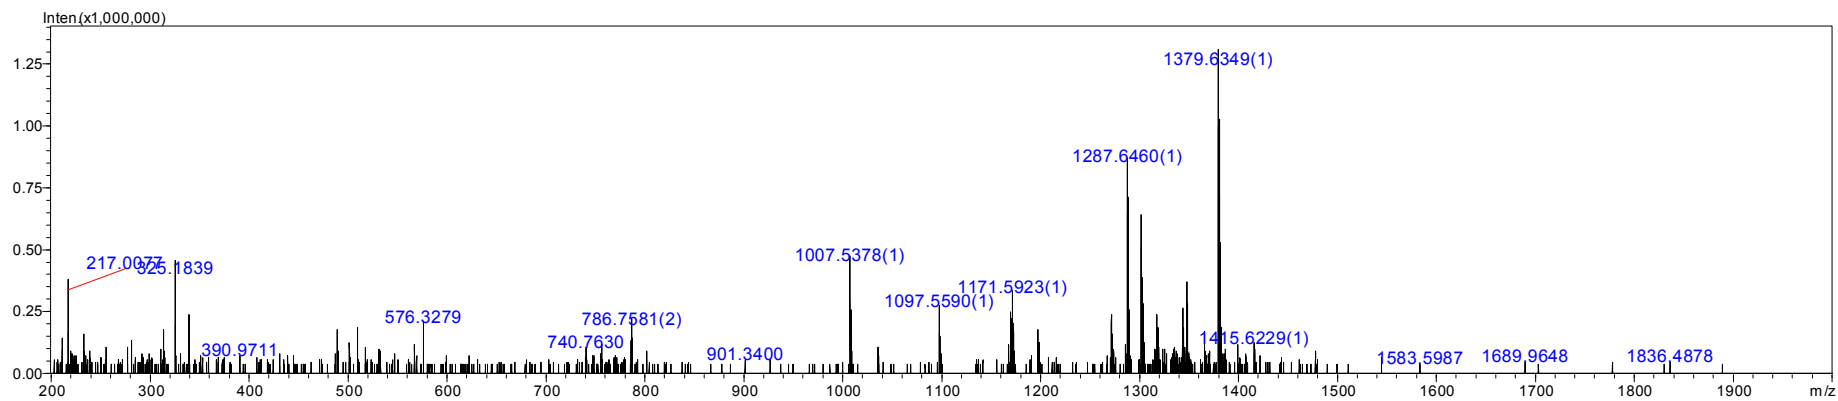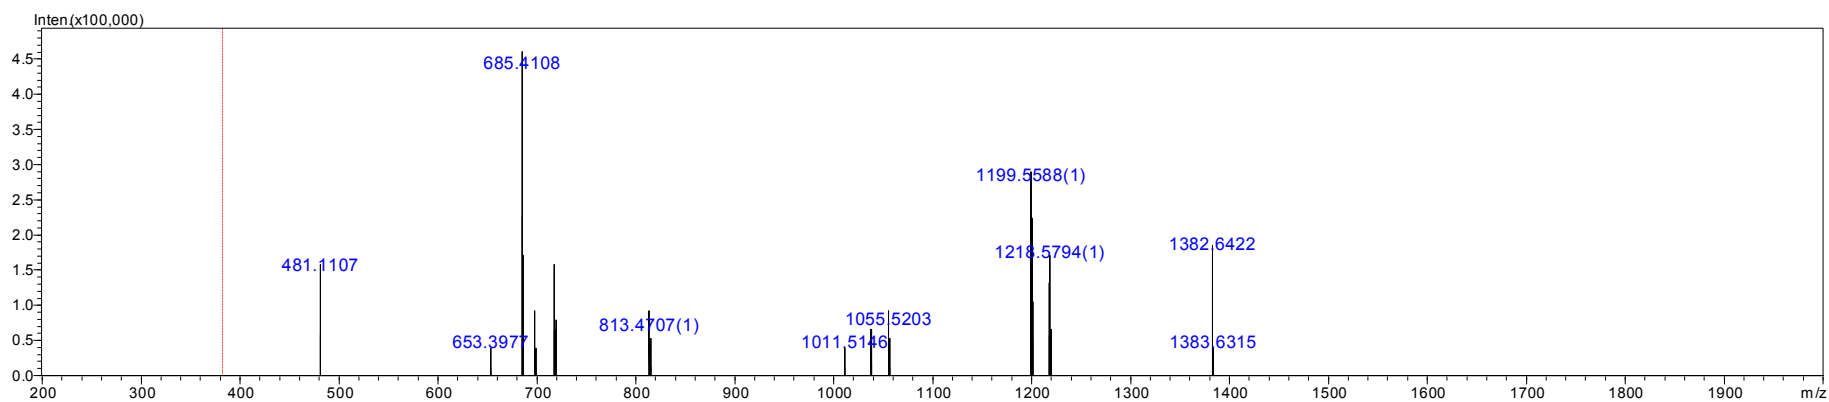

**Peak 22 Retention time (min): 30.505**

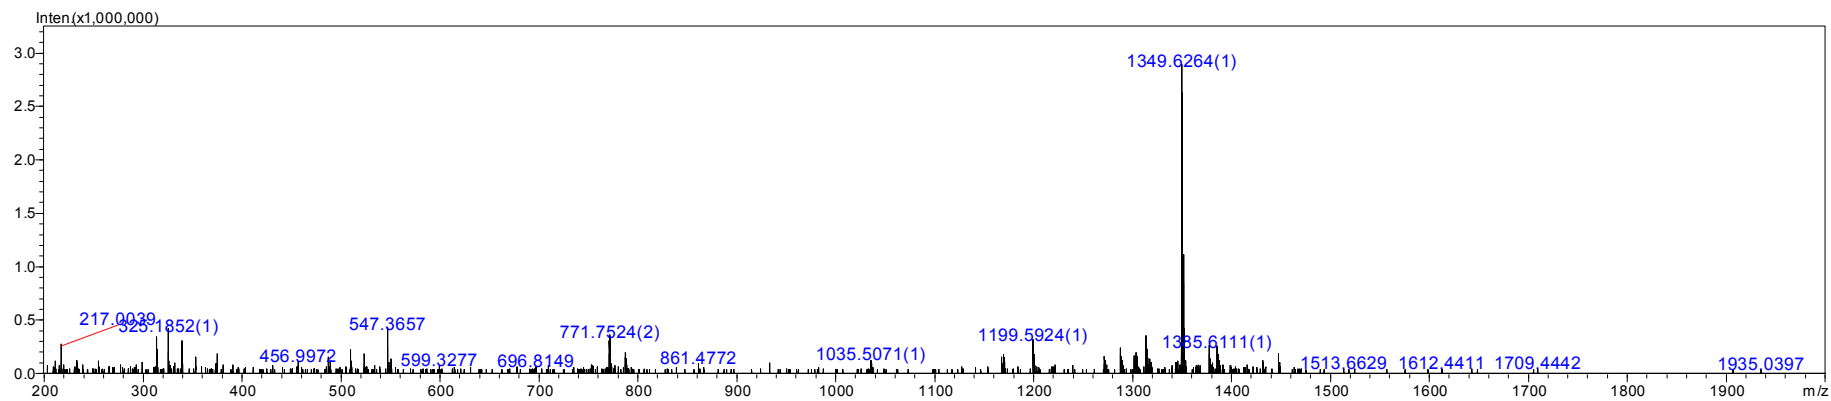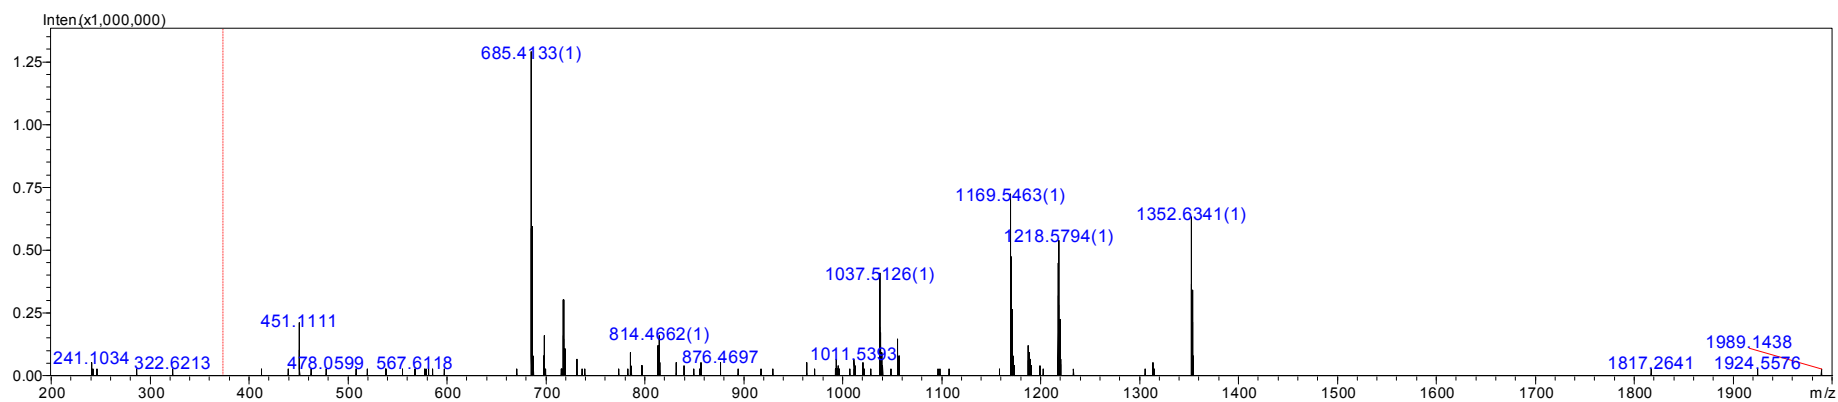

**Peak 23 Retention time (min): 31.138**

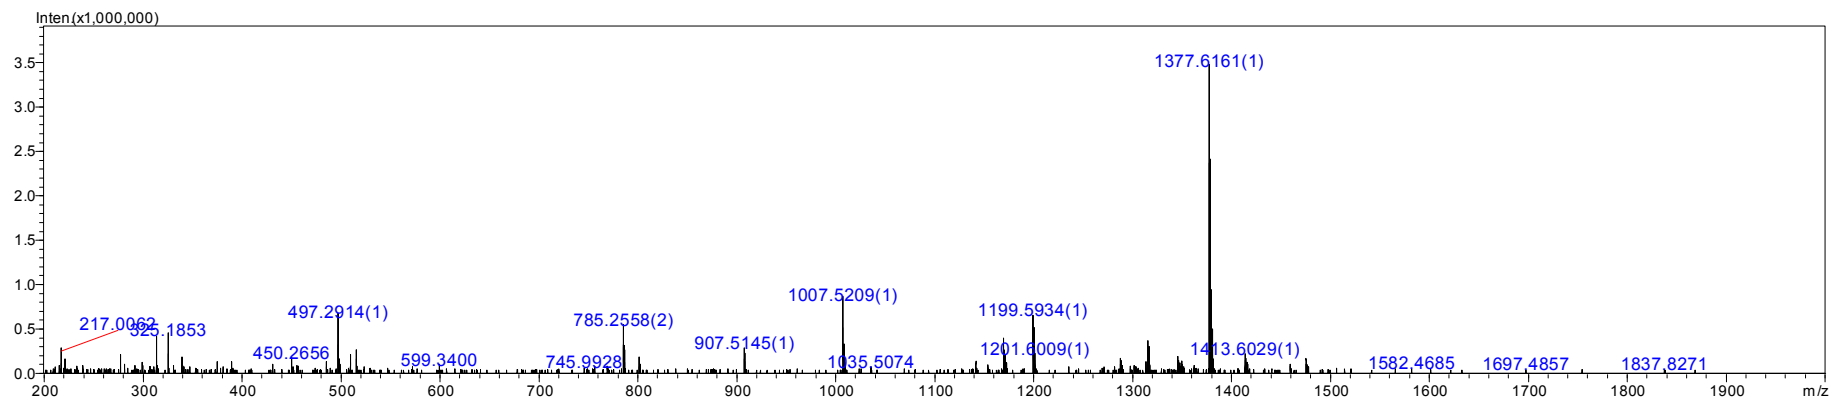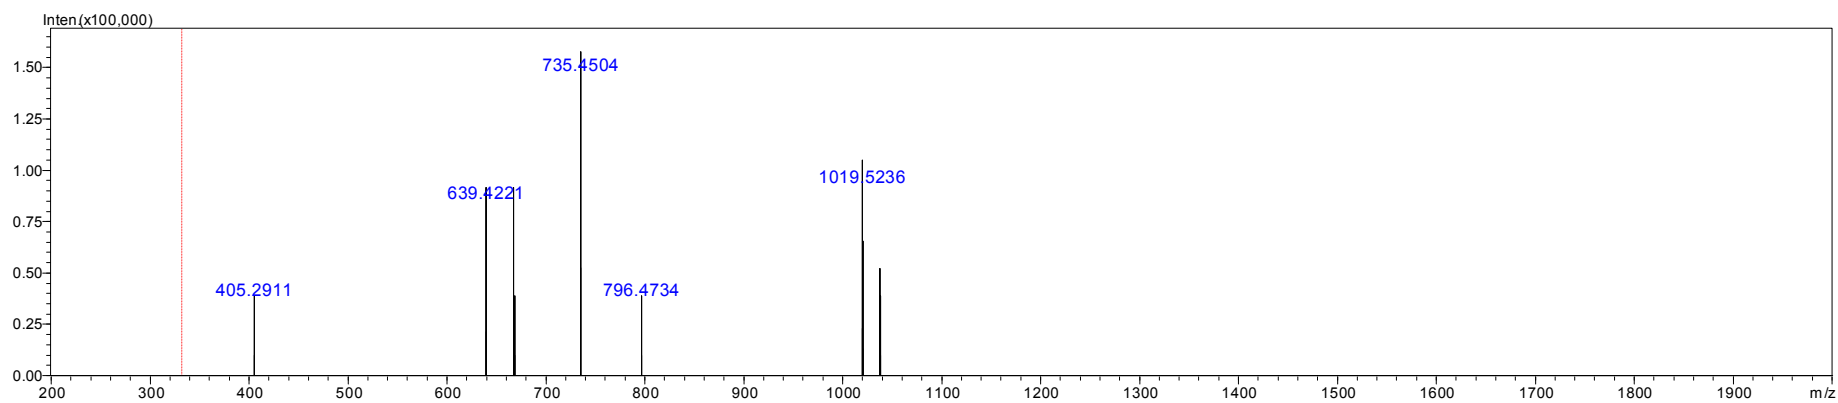

**Peak 24 Retention time (min): 32.341**

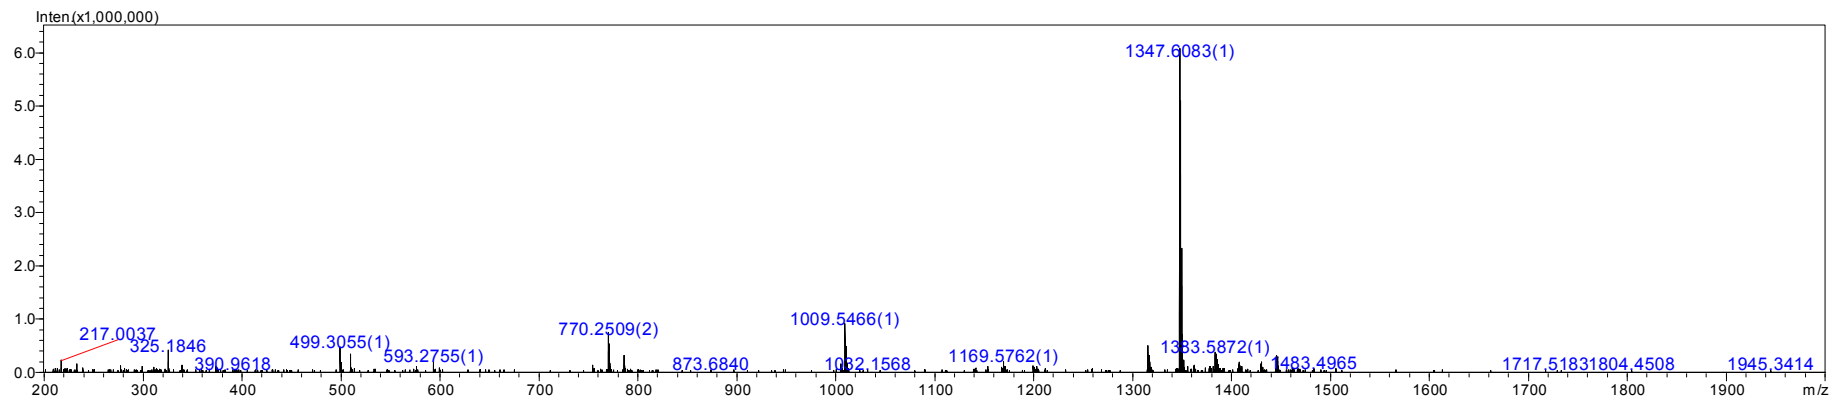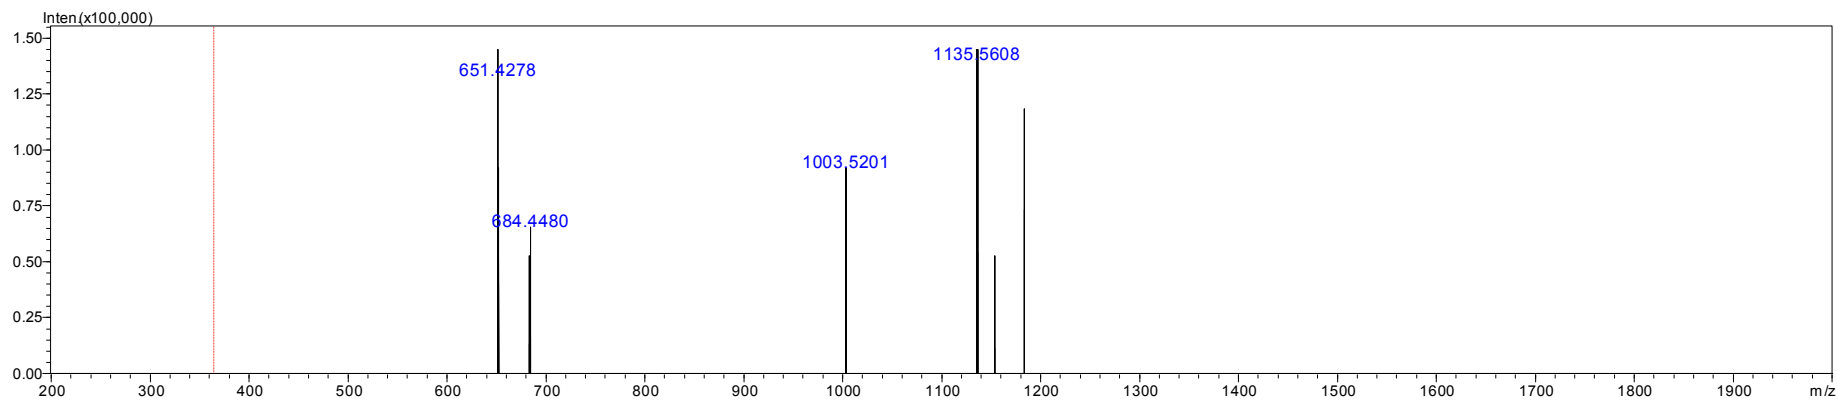



**Peak 25 Retention time (min): 33.353**

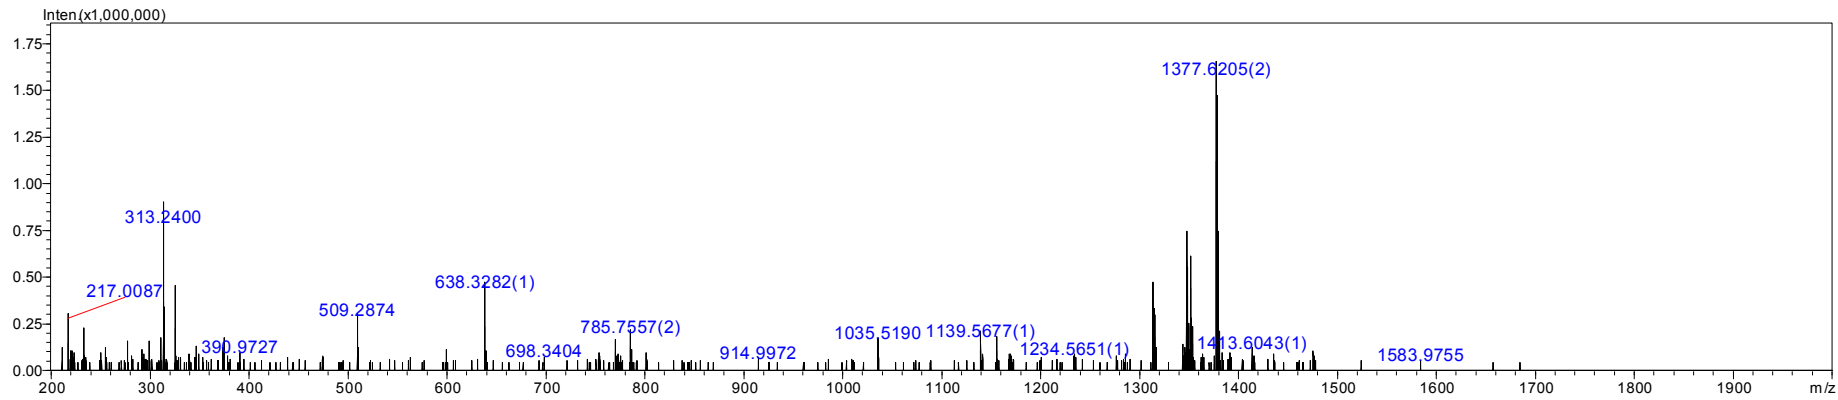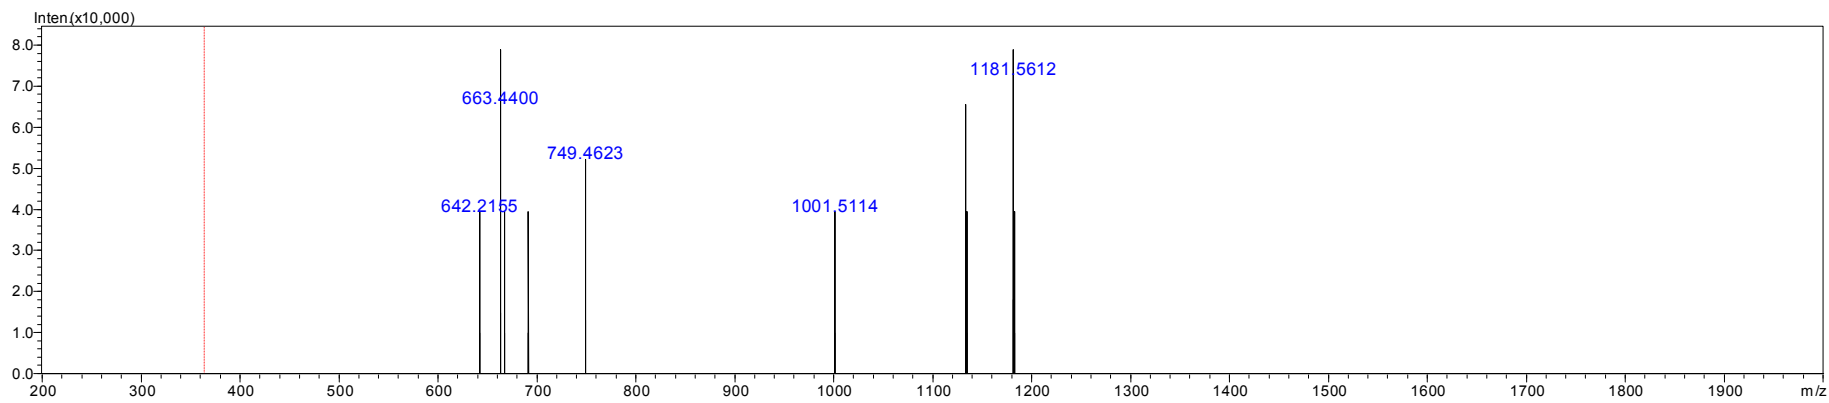

**Peak 26 Retention time (min): 34.935**

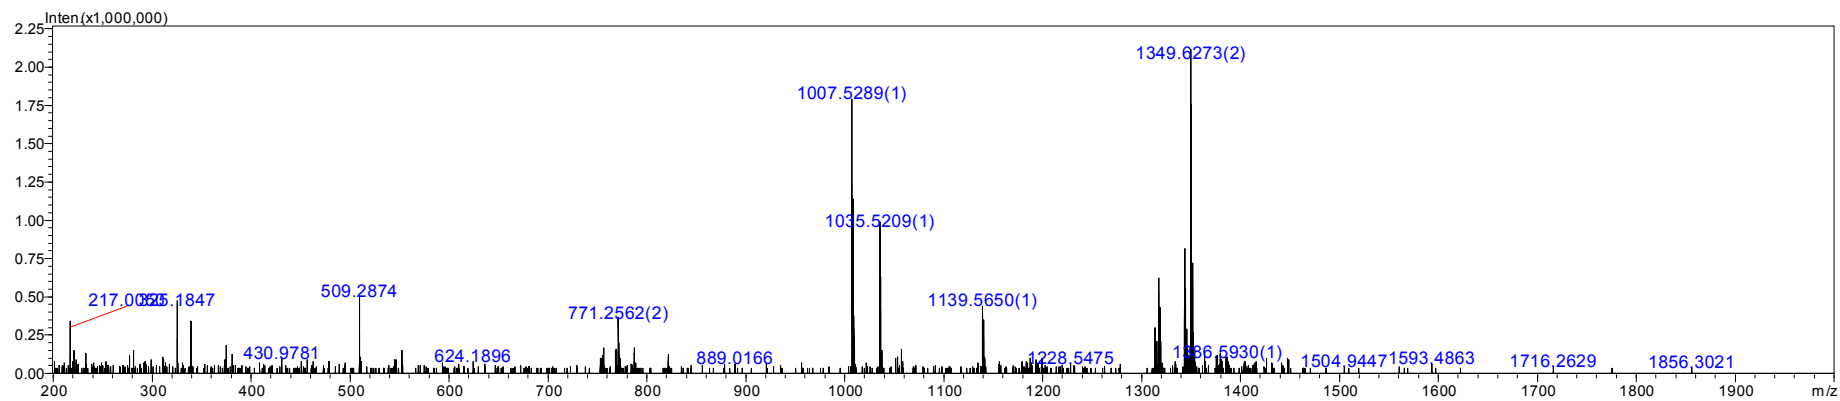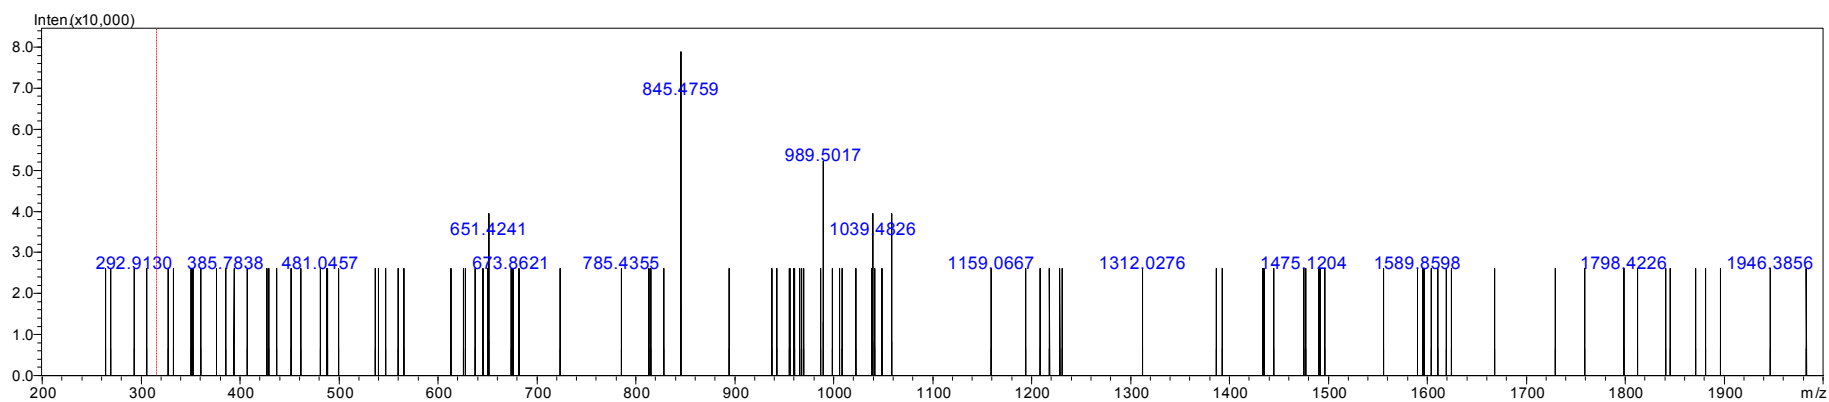

**Peak 27 Retention time (min): 39.556**

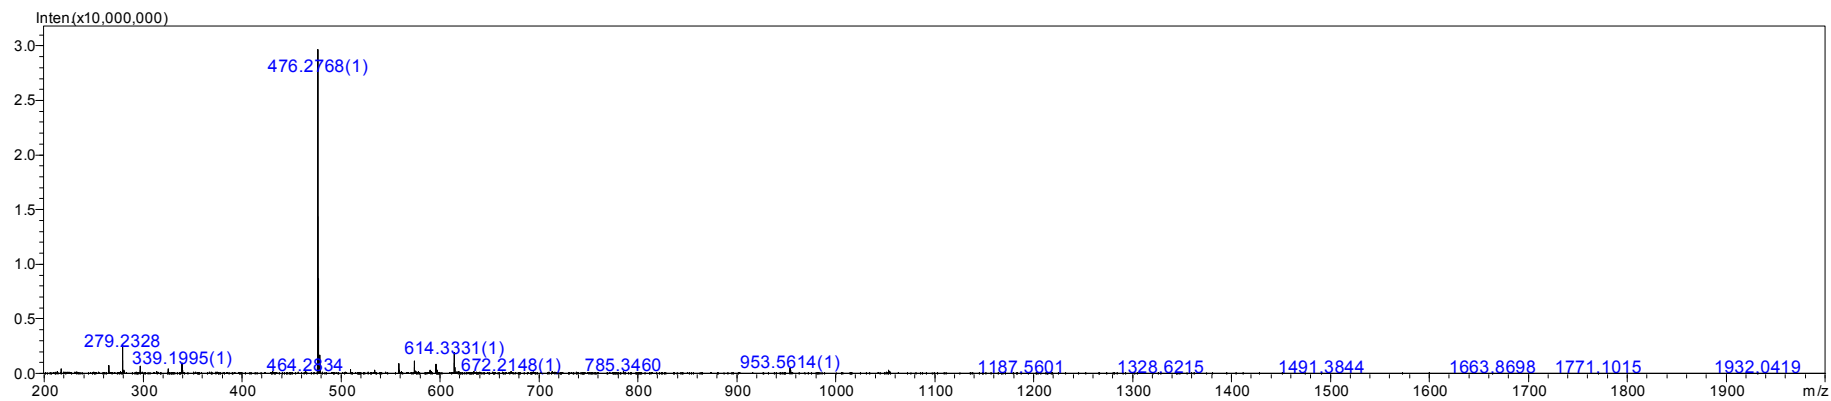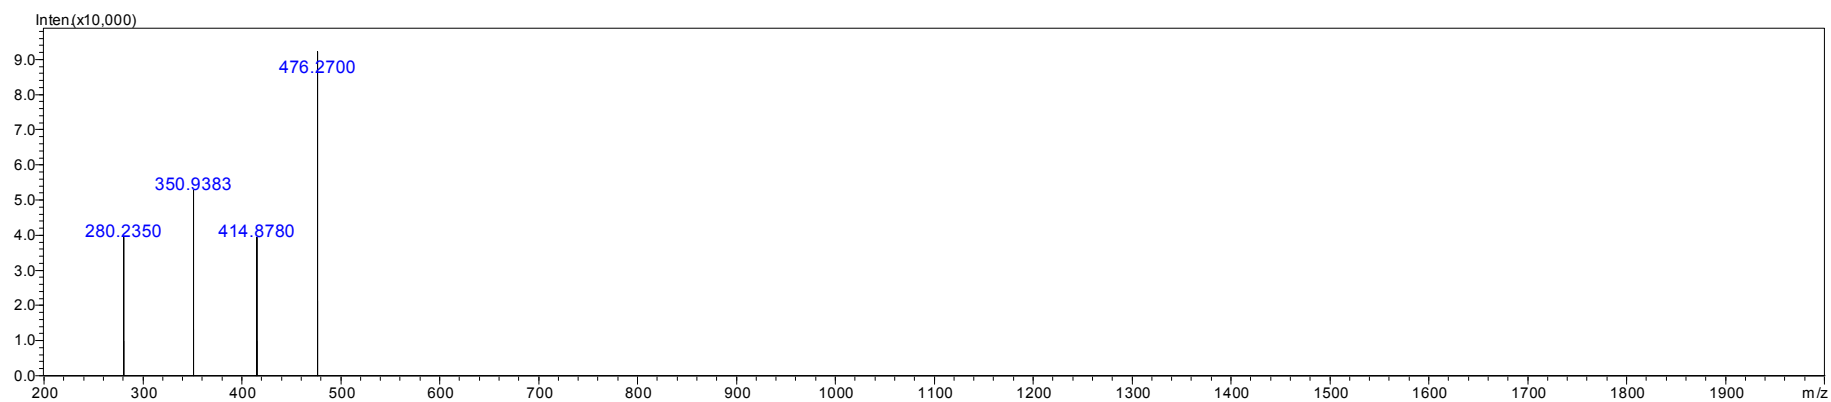

**Peak 28 Retention time (min): 40.128**

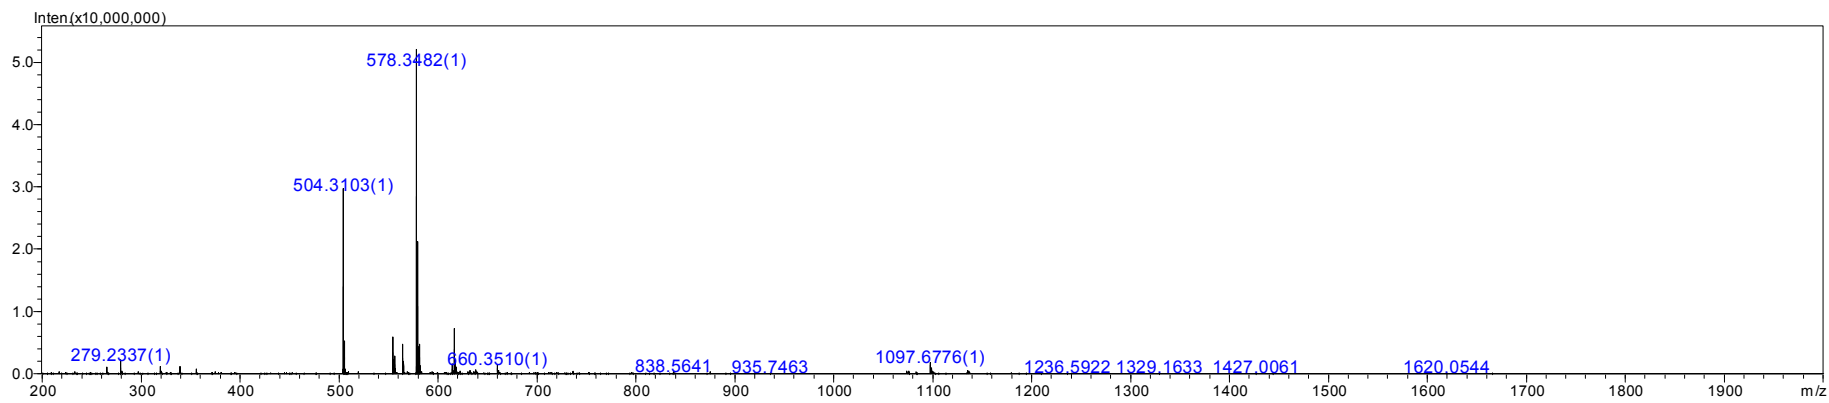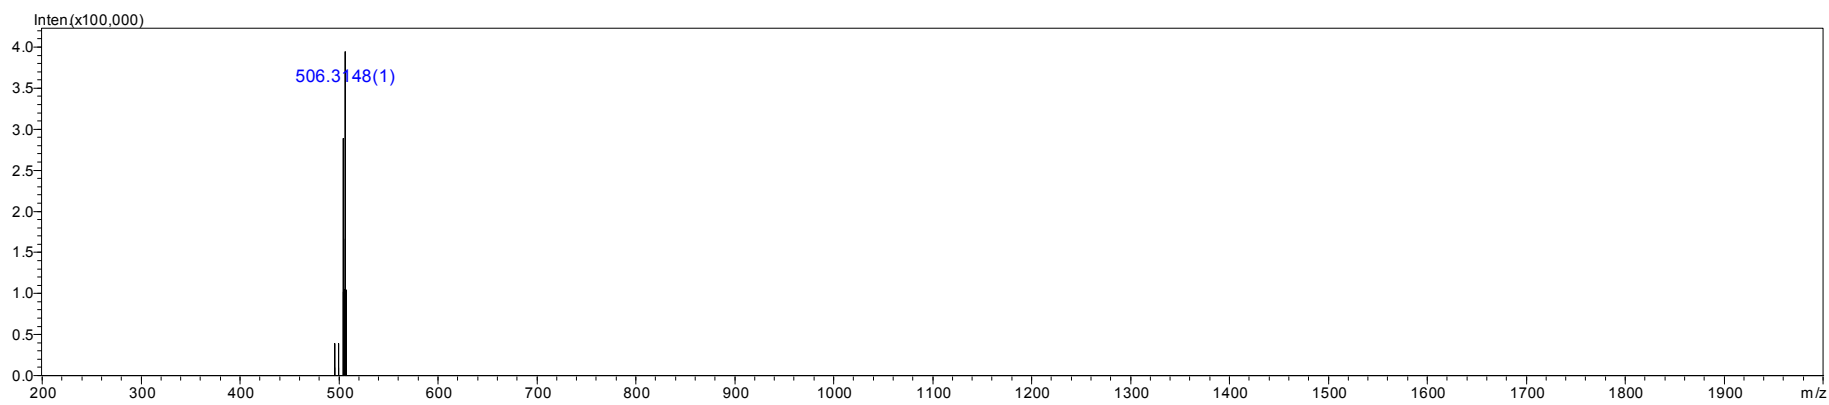

**Peak 29 Retention time (min): 41.264**

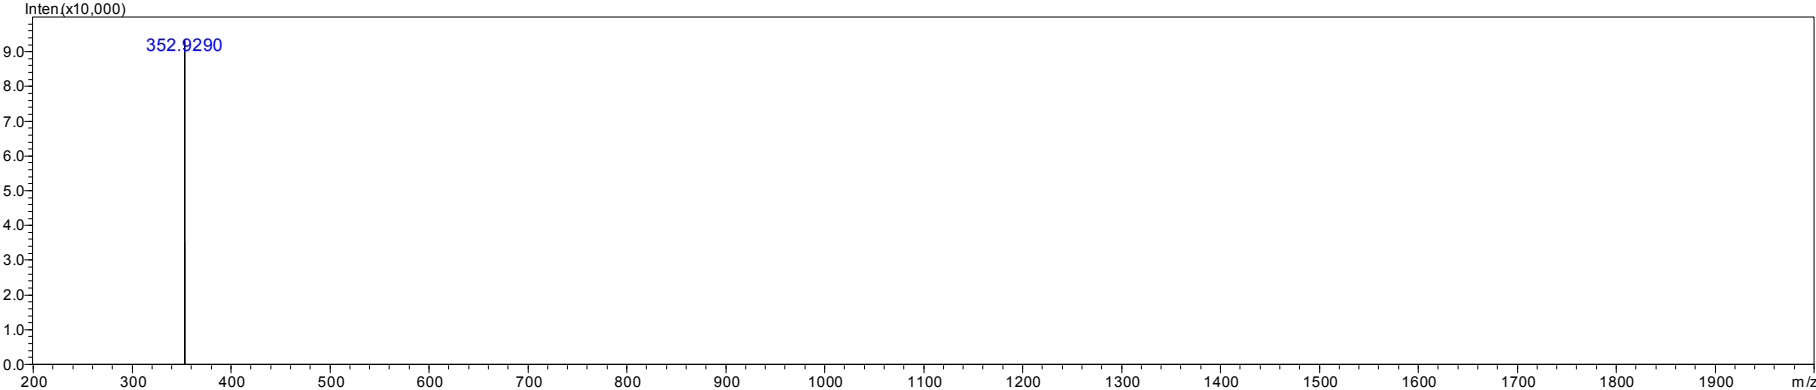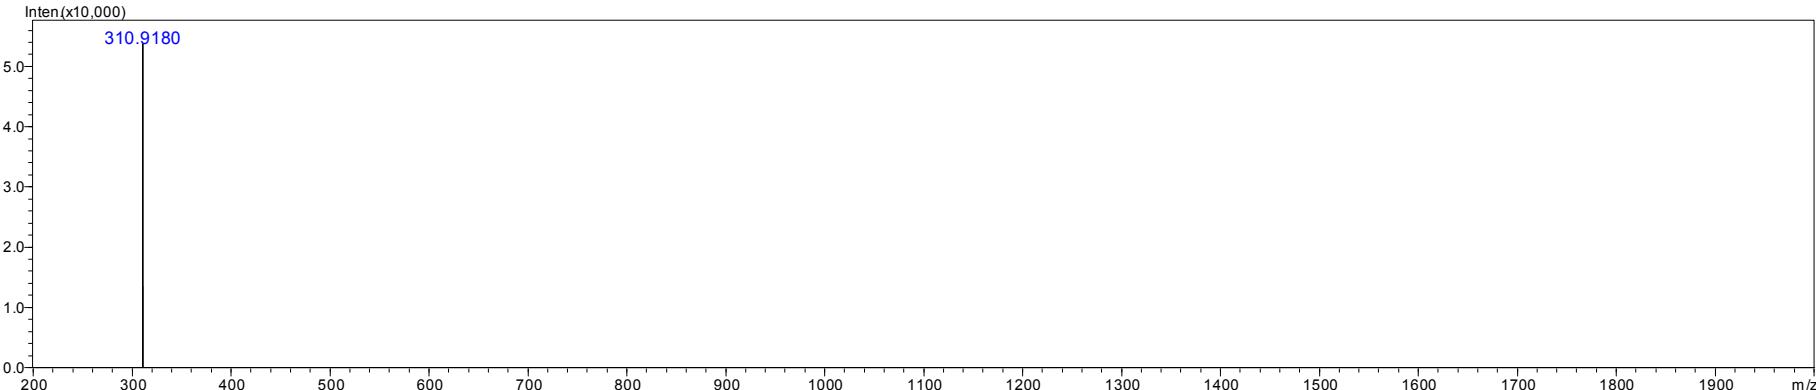

**Peak 30 Retention time (min): 43.543**

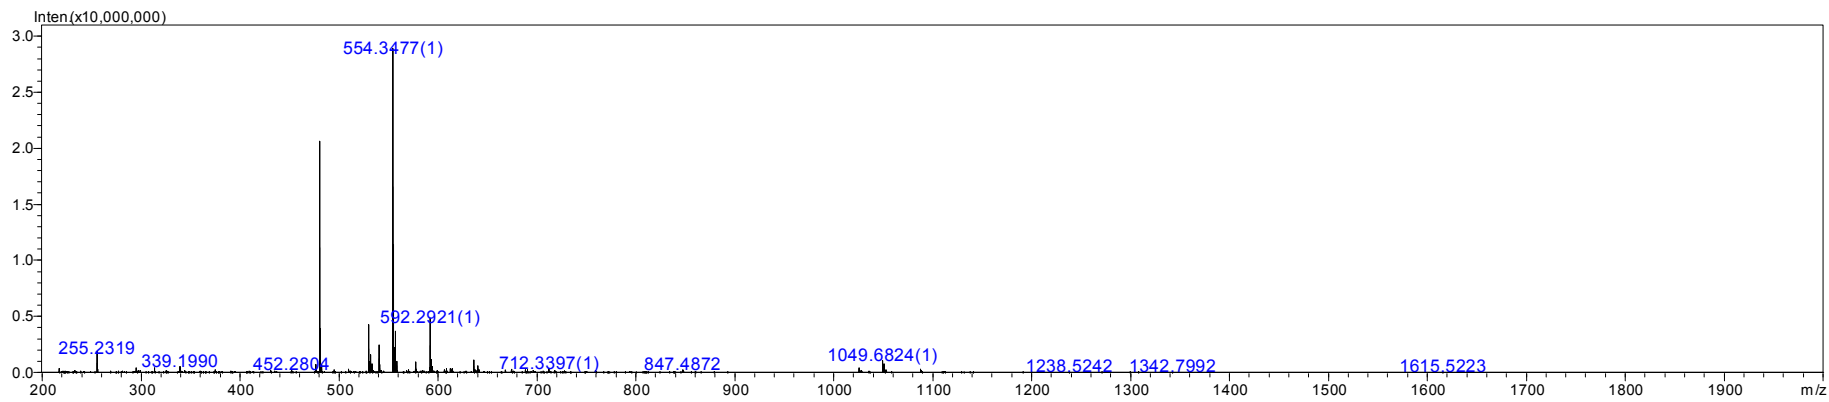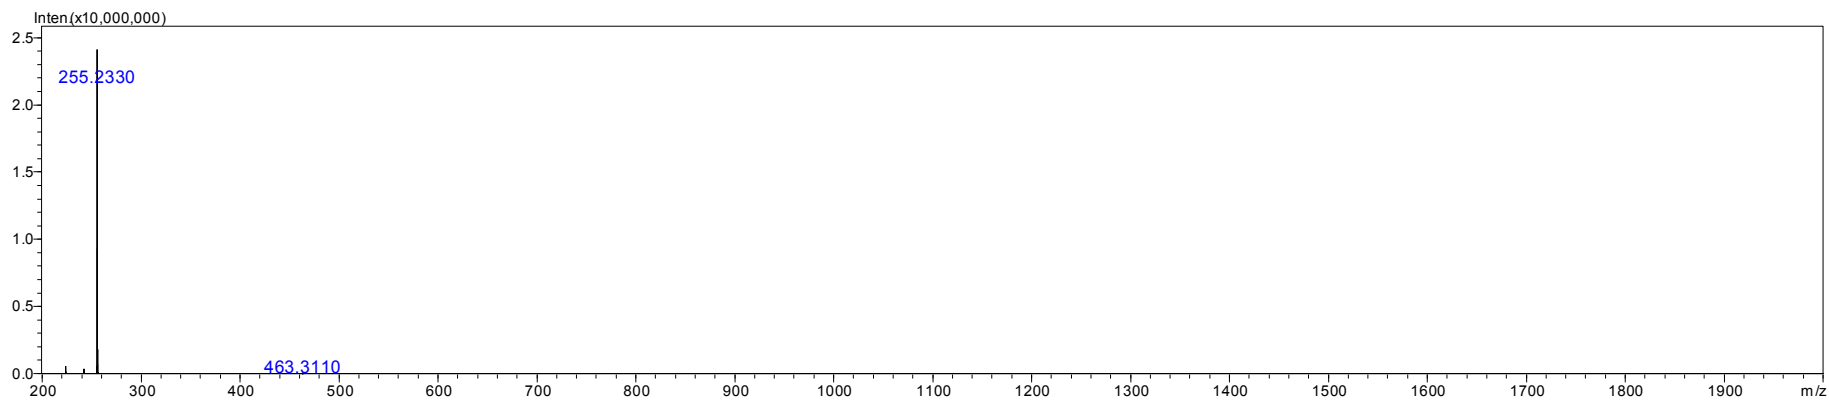

**Peak 31 Retention time (min): 45.372**

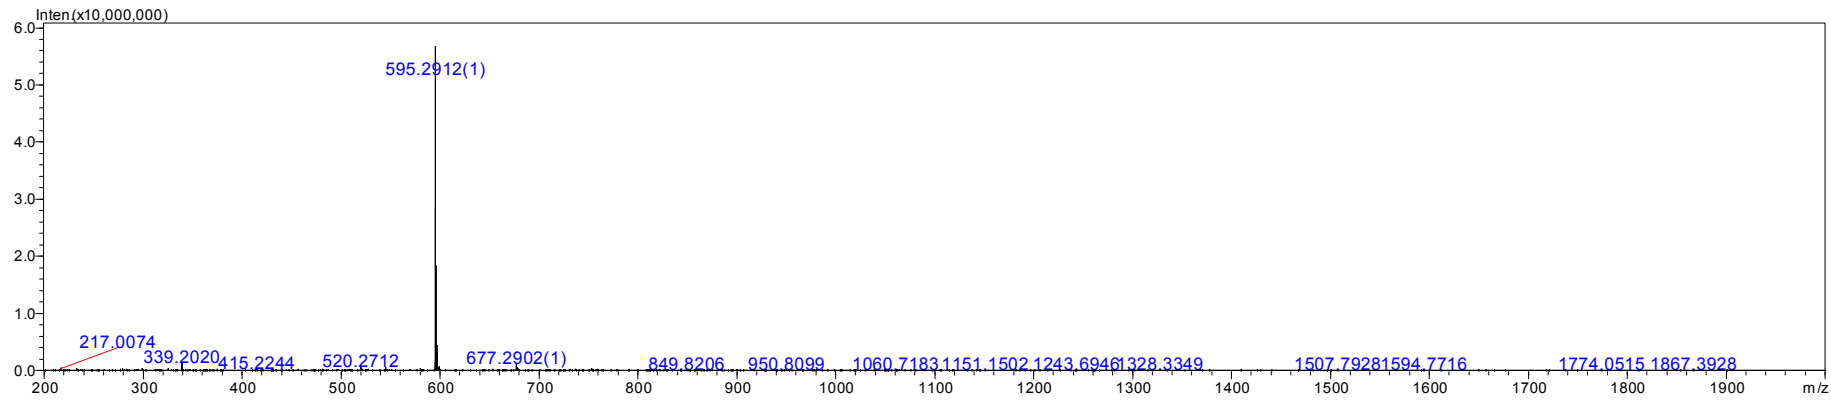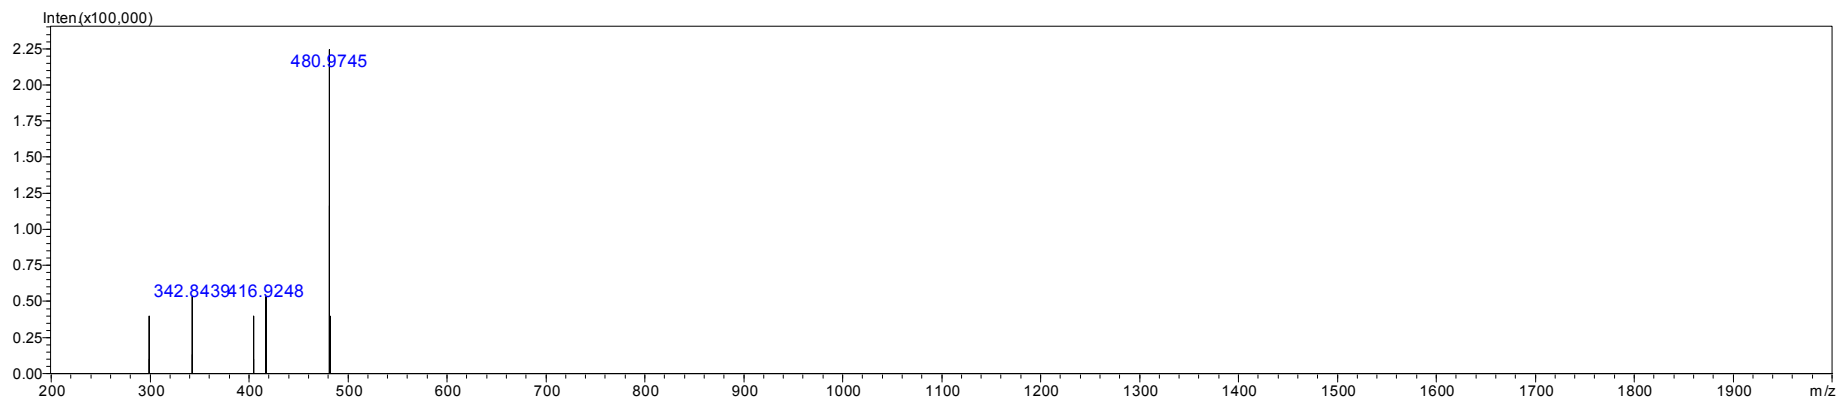

**Peak 32 Retention time (min): 46.434**

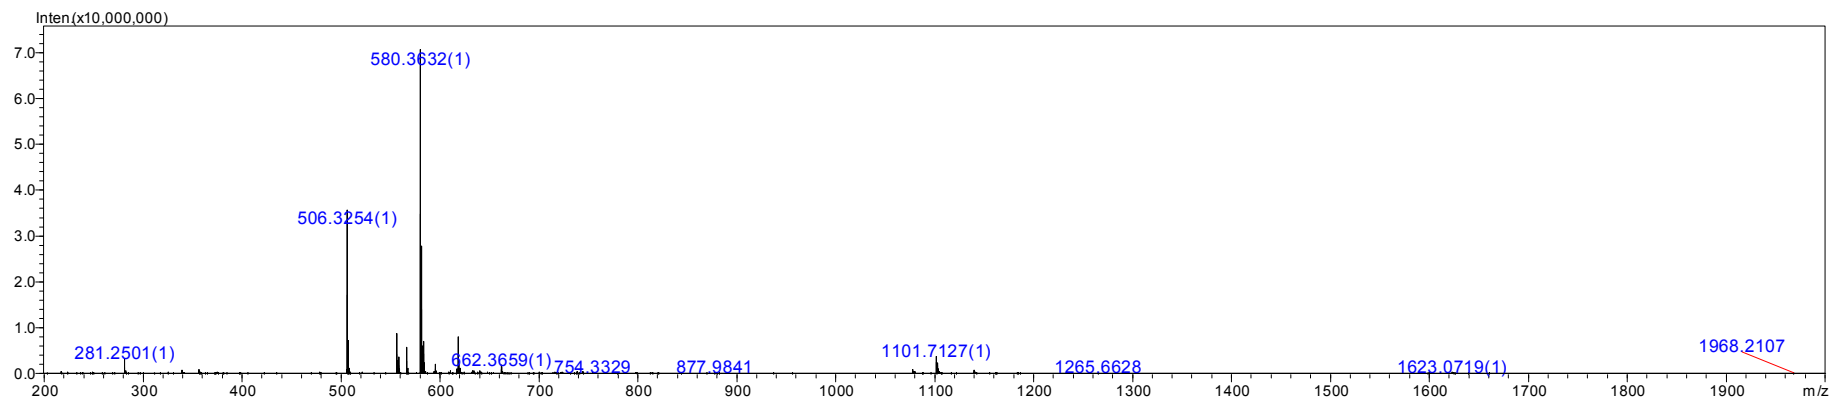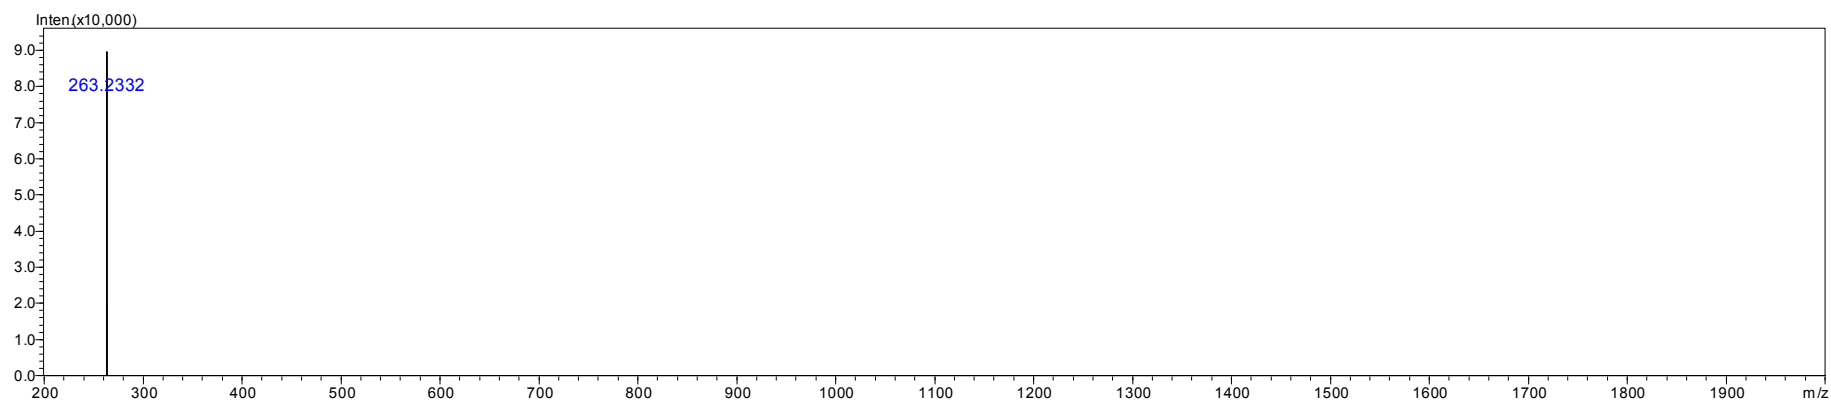



**Peak 33 Retention time (min): 51.171**

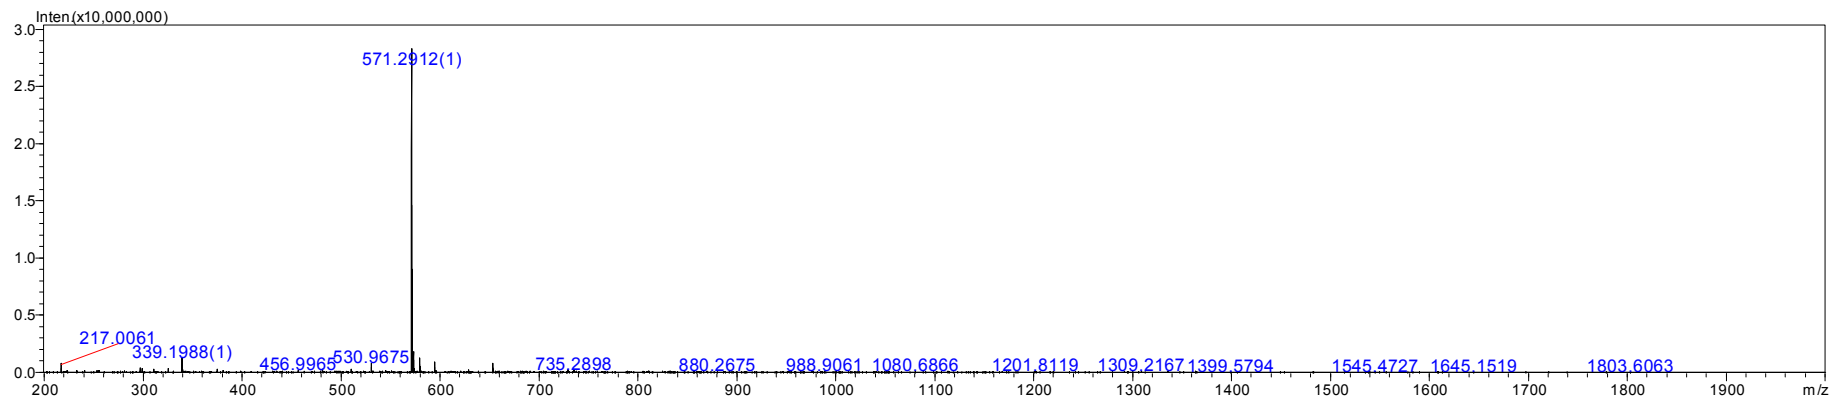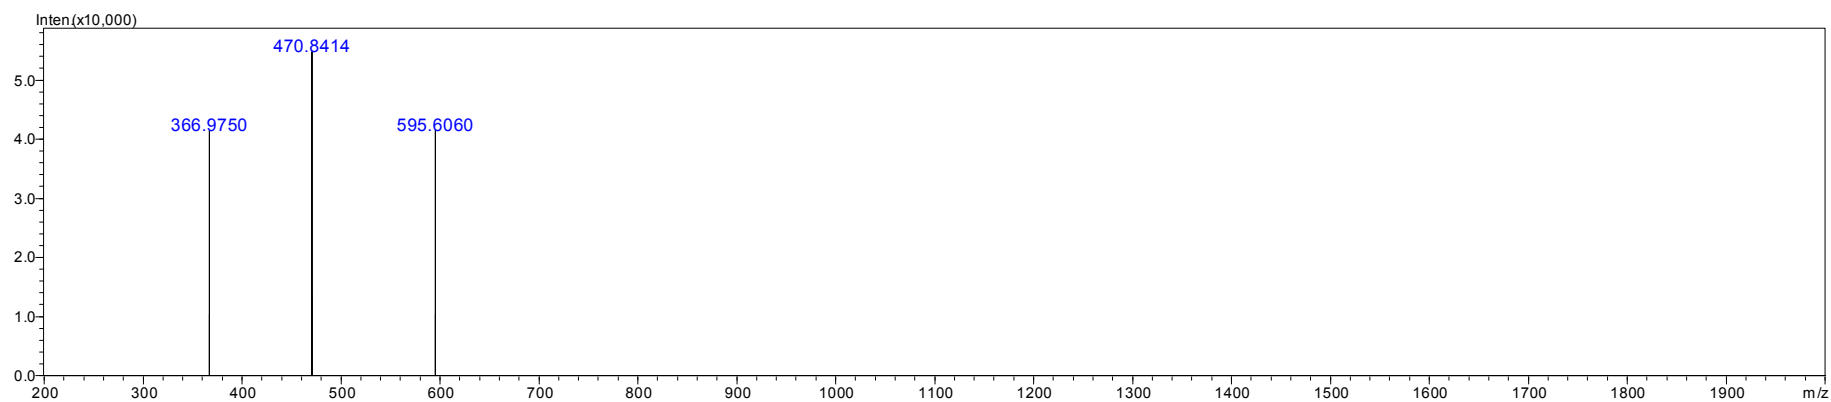

Supplement: molecules-19-07568-s001.pdf [file molecules-19-07568-s001.pdf]
